# Supplementary material for: CAMx–UNIPAR simulation of secondary organic aerosol mass formed from multiphase reactions of hydrocarbons under the Central Valley urban atmospheres of California
Source: Copernicus journal article supplement (doi:10.5194/acp-24-487-2024), 2024-01-12
Supplement: Supplementary file 1 [file acp-24-487-2024-supplement.pdf]

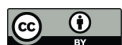

*Supplement of*

## **CAMx–UNIPAR simulation of secondary organic aerosol mass formed from multiphase reactions of hydrocarbons under the Central Valley urban atmospheres of California**

**Yujin Jo et al.**

*Correspondence to:* Myoseon Jang (mjang@ufl.edu)

The copyright of individual parts of the supplement might differ from the article licence.

**Section S1. The model parameters used in the UNIPAR model: product distributions by using lumping species and their physicochemical parameters to predict multiphase partitioning and aerosol phase reactions.**

The lumping species are based on eight volatility ( $10^{-8}$ ,  $10^{-6}$ ,  $10^{-5}$ ,  $10^{-4}$ ,  $10^{-3}$ ,  $10^{-2}$ ,  $10^{-1}$ , and  $10^0$  in mmHg) and six reactivity categories such as very fast (VF), fast (F), medium (M), slow (S), partitioning only (P), and multi-alcohol (MA). Explicit species such as glyoxal (GLY), methylglyoxal (MGLY), and isoprene epoxydiols (IEPOX) are additionally included.

The description of UNIPAR model parameters, such as molecular weight ( $MW_i$ ), oxygen-to-carbon ratio ( $O:C_i$ ), and hydrogen bonding ( $HB_i$ ), are described in Sect. 2.1 of the main manuscript. These parameters are reported in Tables S1–S5 below.

**Table S1.** Averaged molecular weight (MW) (g mol<sup>-1</sup>) of lumping species.

| Lumped Species | Aromatic | Alkane | Terpene | Sesquiterpene | Isoprene |
|----------------|----------|--------|---------|---------------|----------|
| 1VF            | 216.0    | 239.6  | 210.6   | 100.0         | 100.0    |
| 2VF            | 199.0    | 218.9  | 162.1   | 176.1         | 100.0    |
| 3VF            | 182.0    | 198.1  | 207.1   | 100.0         | 100.0    |
| 4VF            | 164.0    | 177.4  | 134.1   | 132.1         | 118.1    |
| 5VF            | 147.0    | 156.6  | 156.4   | 130.1         | 100.0    |
| 6VF            | 156.0    | 135.8  | 142.1   | 142.1         | 116.1    |
| 7VF            | 149.0    | 115.1  | 100.6   | 100.0         | 100.4    |
| 8VF            | 95.0     | 94.3   | 99.1    | 100.0         | 100.1    |
| 1F             | 234.0    | 138.3  | 100.0   | 254.9         | 100.0    |
| 2F             | 217.0    | 131.7  | 100.0   | 249.7         | 100.0    |
| 3F             | 199.0    | 125.0  | 100.0   | 245.5         | 100.0    |
| 4F             | 192.0    | 118.4  | 184.2   | 223.0         | 177.1    |
| 5F             | 163.0    | 111.7  | 163.5   | 206.1         | 100.0    |
| 6F             | 148.0    | 105.1  | 116.8   | 181.3         | 102.1    |
| 7F             | 128.0    | 98.4   | 114.1   | 100.0         | 121.7    |
| 8F             | 110.0    | 91.8   | 72.1    | 72.1          | 97.7     |
| 1M             | 193.0    | 126.6  | 475.1   | 261.9         | 239.3    |
| 2M             | 183.0    | 123.9  | 261.0   | 256.7         | 253.1    |
| 3M             | 172.0    | 121.1  | 216.1   | 246.2         | 189.4    |
| 4M             | 196.0    | 118.3  | 179.1   | 238.4         | 167.8    |
| 5M             | 152.0    | 115.6  | 169.4   | 211.3         | 179.1    |
| 6M             | 141.0    | 112.8  | 168.1   | 156.0         | 121.1    |
| 7M             | 131.0    | 110.0  | 127.7   | 92.3          | 137.5    |
| 8M             | 121.0    | 107.3  | 195.2   | 92.4          | 74.9     |
| 1S             | 207.0    | 225.3  | 362.1   | 342.5         | 100.0    |
| 2S             | 192.0    | 214.9  | 312.2   | 253.8         | 298.7    |
| 3S             | 176.0    | 203.0  | 219.4   | 232.2         | 224.1    |
| 4S             | 160.0    | 191.1  | 211.6   | 252.8         | 179.1    |
| 5S             | 145.0    | 179.3  | 204.4   | 188.4         | 171.1    |
| 6S             | 129.0    | 167.4  | 170.5   | 176.5         | 139.3    |
| 7S             | 113.0    | 155.5  | 236.3   | 163.1         | 100.5    |
| 8S             | 98.0     | 143.6  | 200.0   | 123.2         | 103.8    |
| 1P             | 257.0    | 264.7  | 321.2   | 295.4         | 260.7    |
| 2P             | 232.0    | 218.6  | 316.4   | 234.6         | 226.0    |
| 3P             | 208.0    | 207.1  | 265.7   | 328.0         | 165.1    |
| 4P             | 183.0    | 195.5  | 224.9   | 185.9         | 192.8    |
| 5P             | 158.0    | 184.0  | 213.5   | 252.3         | 222.1    |
| 6P             | 133.0    | 172.5  | 230.6   | 157.1         | 155.5    |
| 7P             | 109.0    | 160.9  | 100.0   | 111.7         | 114.8    |
| 8P             | 84.0     | 149.4  | 112.2   | 85.0          | 103.5    |
| 1MA            | 257.0    | 210.2  | 100.0   | 100.0         | 212.5    |
| 2MA            | 232.0    | 198.6  | 160.2   | 100.0         | 181.1    |
| 3MA            | 208.0    | 106.1  | 100.0   | 100.0         | 100.0    |
| 4MA            | 183.0    | 120.4  | 238.6   | 100.0         | 118.1    |
| 5MA            | 158.0    | 164.0  | 100.0   | 100.0         | 100.0    |
| 6MA            | 133.0    | 152.5  | 100.0   | 100.0         | 100.0    |
| 7MA            | 109.0    | 140.9  | 100.0   | 100.0         | 100.0    |
| 8MA            | 84.0     | 129.4  | 100.0   | 100.0         | 100.0    |
| MGLY           | 72.1     | 72.1   | 72.1    | 72.1          | 72.1     |
| GLY            | 58.0     | 58.0   | 58.0    | 58.0          | 58.0     |
| IEPOX          |          |        |         |               | 118.1    |

**Table S2.** Averaged hydrogen bonding parameter (HB) of lumping species.

| Lumped Species | Aromatic | Alkane | Terpene | Sesquiterpene | Isoprene |
|----------------|----------|--------|---------|---------------|----------|
| 1VF            | 1.7      | 0.0    | 2.0     | 0.0           | 0.0      |
| 2VF            | 1.5      | 0.0    | 2.6     | 2.0           | 0.0      |
| 3VF            | 1.3      | 0.0    | 1.0     | 0.0           | 0.0      |
| 4VF            | 1.1      | 0.0    | 2.0     | 2.0           | 2.0      |
| 5VF            | 0.9      | 0.0    | 0.5     | 1.0           | 0.0      |
| 6VF            | 0.1      | 0.7    | 0.0     | 0.0           | 1.0      |
| 7VF            | 0.5      | 0.6    | 0.3     | 0.0           | 1.0      |
| 8VF            | 0.3      | 0.0    | 0.0     | 0.0           | 0.0      |
| 1F             | 1.7      | 0.0    | 0.0     | 2.0           | 0.0      |
| 2F             | 1.5      | 0.0    | 0.0     | 1.0           | 0.0      |
| 3F             | 1.2      | 0.0    | 0.0     | 0.3           | 0.0      |
| 4F             | 0.9      | 0.5    | 1.0     | 0.0           | 2.0      |
| 5F             | 0.7      | 0.3    | 1.0     | 0.0           | 0.0      |
| 6F             | 0.4      | 0.8    | 1.0     | 0.0           | 1.0      |
| 7F             | 0.2      | 0.7    | 0.0     | 0.0           | 1.0      |
| 8F             | 0.0      | 0.0    | 0.0     | 0.0           | 0.0      |
| 1M             | 2.0      | 0.0    | 1.5     | 1.7           | 4.0      |
| 2M             | 1.7      | 0.0    | 0.7     | 1.1           | 2.0      |
| 3M             | 1.4      | 0.0    | 1.0     | 1.0           | 3.0      |
| 4M             | 0.9      | 1.3    | 1.0     | 0.0           | 2.0      |
| 5M             | 0.9      | 2.0    | 0.4     | 0.3           | 1.0      |
| 6M             | 0.6      | 0.7    | 0.0     | 0.5           | 2.0      |
| 7M             | 0.3      | 1.0    | 0.1     | 1.5           | 1.0      |
| 8M             | 0.0      | 0.1    | 0.2     | 0.3           | 0.7      |
| 1S             | 1.8      | 1.4    | 3.3     | 1.4           | 0.0      |
| 2S             | 1.5      | 1.7    | 3.7     | 1.4           | 2.0      |
| 3S             | 1.3      | 0.8    | 1.8     | 1.1           | 2.0      |
| 4S             | 1.1      | 1.3    | 1.0     | 0.0           | 1.0      |
| 5S             | 0.9      | 1.0    | 1.1     | 0.6           | 1.7      |
| 6S             | 0.7      | 0.5    | 0.7     | 0.1           | 2.0      |
| 7S             | 0.4      | 0.5    | 1.5     | 0.0           | 1.4      |
| 8S             | 0.2      | 0.1    | 1.0     | 0.3           | 1.3      |
| 1P             | 2.2      | 1.5    | 2.9     | 2.1           | 3.3      |
| 2P             | 1.9      | 1.7    | 1.6     | 2.6           | 4.0      |
| 3P             | 1.6      | 0.9    | 2.5     | 0.0           | 3.6      |
| 4P             | 1.2      | 0.6    | 2.0     | 1.9           | 2.5      |
| 5P             | 0.9      | 0.7    | 1.3     | 0.0           | 1.0      |
| 6P             | 0.5      | 0.4    | 1.0     | 0.5           | 1.4      |
| 7P             | 0.2      | 0.3    | 0.0     | 1.1           | 2.0      |
| 8P             | 0.0      | 0.2    | 0.0     | 0.9           | 0.4      |
| 1MA            | 2.2      | 0.0    | 0.0     | 0.0           | 4.5      |
| 2MA            | 1.9      | 0.0    | 3.0     | 0.0           | 4.0      |
| 3MA            | 1.6      | 0.8    | 0.0     | 0.0           | 0.0      |
| 4MA            | 1.2      | 3.0    | 1.0     | 0.0           | 3.0      |
| 5MA            | 0.9      | 0.0    | 0.0     | 0.0           | 0.0      |
| 6MA            | 0.5      | 0.0    | 0.0     | 0.0           | 0.0      |
| 7MA            | 0.2      | 0.0    | 0.0     | 0.0           | 0.0      |
| 8MA            | 0.0      | 0.0    | 0.0     | 0.0           | 0.0      |
| MGLY           | 0.0      | 0.0    | 0.0     | 0.0           | 0.0      |
| GLY            | 0.0      | 0.0    | 0.0     | 0.0           | 0.0      |
| IEPOX          |          |        |         |               | 2.0      |

**Table S3.** Averaged oxygen to carbon ratio (O:C) of lumping species.

| Lumped Species | Aromatic | Alkane | Terpene | Sesquiterpene | Isoprene |
|----------------|----------|--------|---------|---------------|----------|
| 1VF            | 0.9      | 0.5    | 0.8     | 0.4           | 0.4      |
| 2VF            | 0.9      | 0.5    | 1.2     | 1.0           | 0.4      |
| 3VF            | 0.9      | 0.5    | 1.6     | 0.4           | 0.4      |
| 4VF            | 0.8      | 0.5    | 1.3     | 0.8           | 1.0      |
| 5VF            | 0.8      | 0.3    | 0.6     | 0.8           | 0.4      |
| 6VF            | 0.4      | 0.6    | 0.7     | 0.7           | 1.0      |
| 7VF            | 0.5      | 0.9    | 0.8     | 0.4           | 0.8      |
| 8VF            | 0.7      | 0.7    | 0.8     | 0.4           | 0.8      |
| 1F             | 1.0      | 0.5    | 0.4     | 0.4           | 0.4      |
| 2F             | 1.0      | 0.5    | 0.4     | 0.3           | 0.4      |
| 3F             | 0.9      | 0.5    | 0.4     | 0.3           | 0.4      |
| 4F             | 0.7      | 0.6    | 0.3     | 0.2           | 1.2      |
| 5F             | 0.8      | 0.5    | 0.4     | 0.2           | 0.4      |
| 6F             | 0.4      | 0.7    | 0.6     | 0.2           | 0.8      |
| 7F             | 0.7      | 0.6    | 0.6     | 0.4           | 1.0      |
| 8F             | 0.7      | 0.6    | 0.7     | 0.7           | 0.3      |
| 1M             | 1.2      | 0.3    | 0.6     | 0.4           | 1.8      |
| 2M             | 1.1      | 0.3    | 0.7     | 0.3           | 2.0      |
| 3M             | 1.1      | 0.3    | 0.5     | 0.2           | 1.4      |
| 4M             | 1.0      | 0.8    | 0.5     | 0.2           | 1.5      |
| 5M             | 0.9      | 0.8    | 0.6     | 0.2           | 1.7      |
| 6M             | 0.8      | 0.9    | 0.2     | 0.4           | 1.1      |
| 7M             | 0.7      | 0.4    | 0.7     | 1.0           | 0.8      |
| 8M             | 0.6      | 0.3    | 0.4     | 0.5           | 0.7      |
| 1S             | 0.9      | 0.4    | 1.0     | 0.4           | 0.4      |
| 2S             | 0.9      | 0.4    | 1.1     | 0.3           | 2.4      |
| 3S             | 0.9      | 0.4    | 0.8     | 0.2           | 1.6      |
| 4S             | 0.9      | 0.4    | 0.5     | 0.3           | 1.8      |
| 5S             | 0.8      | 0.2    | 0.6     | 0.3           | 1.1      |
| 6S             | 0.8      | 0.5    | 0.2     | 1.0           | 1.2      |
| 7S             | 0.8      | 0.3    | 0.6     | 1.5           | 1.0      |
| 8S             | 0.8      | 0.5    | 0.4     | 0.9           | 0.9      |
| 1P             | 1.2      | 0.5    | 1.1     | 0.4           | 2.0      |
| 2P             | 1.1      | 1.1    | 0.8     | 0.3           | 1.6      |
| 3P             | 0.9      | 0.8    | 0.9     | 0.4           | 1.5      |
| 4P             | 0.8      | 0.4    | 0.6     | 0.5           | 1.6      |
| 5P             | 0.7      | 0.5    | 0.2     | 0.2           | 1.6      |
| 6P             | 0.5      | 0.6    | 1.5     | 1.2           | 1.8      |
| 7P             | 0.4      | 0.6    | 0.4     | 1.6           | 1.6      |
| 8P             | 0.2      | 1.8    | 1.9     | 2.1           | 2.3      |
| 1MA            | 1.2      | 0.3    | 0.4     | 0.4           | 1.5      |
| 2MA            | 1.1      | 0.3    | 0.6     | 0.4           | 1.2      |
| 3MA            | 0.9      | 0.8    | 0.4     | 0.4           | 0.4      |
| 4MA            | 0.8      | 0.6    | 0.6     | 0.4           | 0.6      |
| 5MA            | 0.7      | 0.3    | 0.4     | 0.4           | 0.4      |
| 6MA            | 0.5      | 0.3    | 0.4     | 0.4           | 0.4      |
| 7MA            | 0.4      | 0.3    | 0.4     | 0.4           | 0.4      |
| 8MA            | 0.2      | 0.3    | 0.4     | 0.4           | 0.4      |
| MGLY           | 0.7      | 0.7    | 0.7     | 0.7           | 0.7      |
| GLY            | 1.0      | 1.0    | 1.0     | 1.0           | 1.0      |
| IEPOX          |          |        |         |               | 0.6      |

**Table S4.** Reactivity scale (*R*) of lumping species.

| Lumped Species | Aromatic | Alkane | Terpene | Sesquiterpene | Isoprene |
|----------------|----------|--------|---------|---------------|----------|
| 1VF            | 12.5     | 12.5   | 12.5    | 12.5          | 12.5     |
| 2VF            | 8.5      | 8.5    | 8.5     | 8.5           | 8.5      |
| 3VF            | 8.5      | 8.5    | 8.5     | 8.5           | 8.5      |
| 4VF            | 8.5      | 8.5    | 8.5     | 8.5           | 8.5      |
| 5VF            | 8.5      | 8.5    | 8.5     | 8.5           | 8.5      |
| 6VF            | 8.5      | 8.5    | 8.5     | 8.5           | 8.5      |
| 7VF            | 8.5      | 8.5    | 8.5     | 8.5           | 8.5      |
| 8VF            | 8.5      | 8.5    | 8.5     | 8.5           | 8.5      |
| 1F             | 12.5     | 12.5   | 12.5    | 12.5          | 12.5     |
| 2F             | 8.2      | 8.2    | 8.2     | 8.2           | 8.2      |
| 3F             | 8.2      | 8.2    | 8.2     | 8.2           | 8.2      |
| 4F             | 8.2      | 8.2    | 8.2     | 8.2           | 8.2      |
| 5F             | 8.2      | 8.2    | 8.2     | 8.2           | 8.2      |
| 6F             | 8.2      | 8.2    | 8.2     | 8.2           | 8.2      |
| 7F             | 8.2      | 8.2    | 8.2     | 8.2           | 8.2      |
| 8F             | 8.2      | 8.2    | 8.2     | 8.2           | 8.2      |
| 1M             | 12.5     | 12.5   | 12.5    | 12.5          | 12.5     |
| 2M             | 4.0      | 4.0    | 4.0     | 4.0           | 4.0      |
| 3M             | 4.0      | 4.0    | 4.0     | 4.0           | 4.0      |
| 4M             | 4.0      | 4.0    | 4.0     | 4.0           | 4.0      |
| 5M             | 4.0      | 4.0    | 4.0     | 4.0           | 4.0      |
| 6M             | 4.0      | 4.0    | 4.0     | 4.0           | 4.0      |
| 7M             | 4.0      | 4.0    | 4.0     | 4.0           | 4.0      |
| 8M             | 4.0      | 4.0    | 4.0     | 4.0           | 4.0      |
| 1S             | 12.5     | 12.5   | 12.5    | 12.5          | 12.5     |
| 2S             | 1.0      | 1.0    | 1.0     | 1.0           | 1.0      |
| 3S             | 1.0      | 1.0    | 1.0     | 1.0           | 1.0      |
| 4S             | 1.0      | 1.0    | 1.0     | 1.0           | 1.0      |
| 5S             | 1.0      | 1.0    | 1.0     | 1.0           | 1.0      |
| 6S             | 1.0      | 1.0    | 1.0     | 1.0           | 1.0      |
| 7S             | 1.0      | 1.0    | 1.0     | 1.0           | 1.0      |
| 8S             | 1.0      | 1.0    | 1.0     | 1.0           | 1.0      |
| 1P             | 12.5     | 12.5   | 12.5    | 12.5          | 12.5     |
| 2P             | 0.0      | 0.0    | 0.0     | 0.0           | 0.0      |
| 3P             | 0.0      | 0.0    | 0.0     | 0.0           | 0.0      |
| 4P             | 0.0      | 0.0    | 0.0     | 0.0           | 0.0      |
| 5P             | 0.0      | 0.0    | 0.0     | 0.0           | 0.0      |
| 6P             | 0.0      | 0.0    | 0.0     | 0.0           | 0.0      |
| 7P             | 0.0      | 0.0    | 0.0     | 0.0           | 0.0      |
| 8P             | 0.0      | 0.0    | 0.0     | 0.0           | 0.0      |
| 1MA            | 12.5     | 12.5   | 12.5    | 12.5          | 12.5     |
| 2MA            | 0.0      | 0.0    | 0.0     | 0.0           | 0.0      |
| 3MA            | 0.0      | 0.0    | 0.0     | 0.0           | 0.0      |
| 4MA            | 0.0      | 0.0    | 0.0     | 0.0           | 0.0      |
| 5MA            | 0.0      | 0.0    | 0.0     | 0.0           | 0.0      |
| 6MA            | 0.0      | 0.0    | 0.0     | 0.0           | 0.0      |
| 7MA            | 0.0      | 0.0    | 0.0     | 0.0           | 0.0      |
| 8MA            | 0.0      | 0.0    | 0.0     | 0.0           | 0.0      |
| MGLY           | 9.0      | 9.0    | 9.0     | 9.0           | 9.0      |
| GLY            | 12.5     | 12.5   | 12.5    | 12.5          | 12.5     |
| IEPOX          |          |        |         |               | 2.0      |

**Table S5.** The basicity constant ( $pK_{BH}$ ) of lumping species.

| Lumped Species | Aromatic | Alkane | Terpene | Sesquiterpene | Isoprene |
|----------------|----------|--------|---------|---------------|----------|
| 1VF            | -1.5     | -1.5   | -1.5    | -1.5          | -1.5     |
| 2VF            | -1.5     | -1.5   | -1.5    | -1.5          | -1.5     |
| 3VF            | -1.5     | -1.5   | -1.5    | -1.5          | -1.5     |
| 4VF            | -1.5     | -1.5   | -1.5    | -1.5          | -1.5     |
| 5VF            | -1.5     | -1.5   | -1.5    | -1.5          | -1.5     |
| 6VF            | -1.5     | -1.5   | -1.5    | -1.5          | -1.5     |
| 7VF            | -1.5     | -1.5   | -1.5    | -1.5          | -1.5     |
| 8VF            | -1.5     | -1.5   | -1.5    | -1.5          | -1.5     |
| 1F             | -1.5     | -1.5   | -1.5    | -1.5          | -1.5     |
| 2F             | -1.5     | -1.5   | -1.5    | -1.5          | -1.5     |
| 3F             | -1.5     | -1.5   | -1.5    | -1.5          | -1.5     |
| 4F             | -1.5     | -1.5   | -1.5    | -1.5          | -1.5     |
| 5F             | -1.5     | -1.5   | -1.5    | -1.5          | -1.5     |
| 6F             | -1.5     | -1.5   | -1.5    | -1.5          | -1.5     |
| 7F             | -1.5     | -1.5   | -1.5    | -1.5          | -1.5     |
| 8F             | -1.5     | -1.5   | -1.5    | -1.5          | -1.5     |
| 1M             | -1.5     | -1.5   | -1.5    | -1.5          | -1.5     |
| 2M             | -1.5     | -1.5   | -1.5    | -1.5          | -1.5     |
| 3M             | -1.5     | -1.5   | -1.5    | -1.5          | -1.5     |
| 4M             | -1.5     | -1.5   | -1.5    | -1.5          | -1.5     |
| 5M             | -1.5     | -1.5   | -1.5    | -1.5          | -1.5     |
| 6M             | -1.5     | -1.5   | -1.5    | -1.5          | -1.5     |
| 7M             | -1.5     | -1.5   | -1.5    | -1.5          | -1.5     |
| 8M             | -1.5     | -1.5   | -1.5    | -1.5          | -1.5     |
| 1S             | -2.0     | -2.0   | -2.0    | -2.0          | -2.0     |
| 2S             | -2.0     | -2.0   | -2.0    | -2.0          | -2.0     |
| 3S             | -2.0     | -2.0   | -2.0    | -2.0          | -2.0     |
| 4S             | -2.0     | -2.0   | -2.0    | -2.0          | -2.0     |
| 5S             | -2.0     | -2.0   | -2.0    | -2.0          | -2.0     |
| 6S             | -2.0     | -2.0   | -2.0    | -2.0          | -2.0     |
| 7S             | -2.0     | -2.0   | -2.0    | -2.0          | -2.0     |
| 8S             | -2.0     | -2.0   | -2.0    | -2.0          | -2.0     |
| 1P             | -2.0     | -2.0   | -2.0    | -2.0          | -2.0     |
| 2P             | 0.0      | 0.0    | 0.0     | 0.0           | 0.0      |
| 3P             | 0.0      | 0.0    | 0.0     | 0.0           | 0.0      |
| 4P             | 0.0      | 0.0    | 0.0     | 0.0           | 0.0      |
| 5P             | 0.0      | 0.0    | 0.0     | 0.0           | 0.0      |
| 6P             | 0.0      | 0.0    | 0.0     | 0.0           | 0.0      |
| 7P             | 0.0      | 0.0    | 0.0     | 0.0           | 0.0      |
| 8P             | 0.0      | 0.0    | 0.0     | 0.0           | 0.0      |
| 1MA            | -2.0     | -2.0   | -2.0    | -2.0          | -2.0     |
| 2MA            | 0.0      | 0.0    | 0.0     | 0.0           | 0.0      |
| 3MA            | 0.0      | 0.0    | 0.0     | 0.0           | 0.0      |
| 4MA            | 0.0      | 0.0    | 0.0     | 0.0           | 0.0      |
| 5MA            | 0.0      | 0.0    | 0.0     | 0.0           | 0.0      |
| 6MA            | 0.0      | 0.0    | 0.0     | 0.0           | 0.0      |
| 7MA            | 0.0      | 0.0    | 0.0     | 0.0           | 0.0      |
| 8MA            | 0.0      | 0.0    | 0.0     | 0.0           | 0.0      |
| MGLY           | -1.5     | -1.5   | -1.5    | -1.5          | -1.5     |
| GLY            | -1.5     | -1.5   | -1.5    | -1.5          | -1.5     |
| IEPOX          |          |        |         |               | -1.5     |

## Section S2. Summary of the configuration of the regional model

**Table S6.** Model configurations

---

| <b>WRF v4.1 configuration</b> |                                                                      |
|-------------------------------|----------------------------------------------------------------------|
| Horizontal resolution         | D01(36 × 36km), D02(12 × 12km), D03(4 × 4km)                         |
| Microphysics                  | Morrison 2-moment (Morrison et al., 2009)                            |
| Longwave radiation            | RRTMG (Iacono et al., 2008)                                          |
| Shortwave radiation option    | RRTMG (Iacono et al., 2008)                                          |
| Surface-layer                 | Revised MM5 (Jiménez et al., 2012)                                   |
| Land-surface                  | Pleim-Xu (Pleim and Gilliam, 2009)                                   |
| Boundary-layer                | ACM2 (Pleim, 2007)                                                   |
| Cumulus                       | Kain–Fritsch Cumulus Potential Scheme (D01, D02) (Berg et al., 2013) |

---

| <b>CAMx v7.1 configuration</b> |                                                               |
|--------------------------------|---------------------------------------------------------------|
| Horizontal resolution          | 4km x 4km (185 × 185 grids)                                   |
| Vertical resolution            | 22 eta levels                                                 |
| Horizontal advection           | Piecewise Parabolic Method (PPM) (Colella and Woodward, 1984) |
| Gas-phase chemical mechanism   | SAPRC07TC (Hutzell et al., 2012)                              |
| Aerosol treatment              | Static 2-mode (Coarse-Fine; CF Scheme) for size distribution  |
| Inorganic PM chemistry         | ISOPPOPIA (Nenes et al., 1998; Fountoukis and Nenes, 2007)    |
| Organic PM chemistry           | UNIPAR                                                        |
| Dry deposition model           | Resistance model (Zhang et al., 2003)                         |
| Wet deposition                 | Scavenging model (Seinfeld and Pandis, 1998)                  |

---



**Section S3. Meteorological variables (temperature, humidity, winds, Planetary Boundary Layer (PBL)), Efflorescent RH (ERH), and Deliquescence RH (DRH) and equations of statistical analyses between observations and simulations**

**Table S7.** Statistics summary of surface temperature, relative humidity, and wind speed from WRF simulation.

|                    |            | <b>Mean<br/>(OBS)</b> | <b>Mean<br/>(WRF)</b> | <b>R</b> | <b>IOA</b> | <b>MB</b> |
|--------------------|------------|-----------------------|-----------------------|----------|------------|-----------|
| <b>San Jose</b>    | Temp. (°C) | 12.42                 | 12.07                 | 0.93     | 0.96       | -0.35     |
|                    | RH (%)     | 69.16                 | 73.32                 | 0.87     | 0.92       | 4.17      |
|                    | WS (m/s)   | 2.38                  | 1.92                  | 0.74     | 0.79       | -0.46     |
| <b>Sacramento</b>  | Temp. (°C) | 10.06                 | 10.76                 | 0.92     | 0.95       | 0.7       |
|                    | RH (%)     | 79.27                 | 75.64                 | 0.91     | 0.95       | -3.63     |
|                    | WS (m/s)   | 1.25                  | 1.97                  | 0.68     | 0.76       | 0.72      |
| <b>Fresno</b>      | Temp. (°C) | 11.04                 | 11.41                 | 0.93     | 0.96       | 0.37      |
|                    | RH (%)     | 70.6                  | 76.02                 | 0.89     | 0.93       | 5.42      |
|                    | WS (m/s)   | 1.07                  | 1.63                  | 0.61     | 0.71       | 0.55      |
| <b>Bakersfield</b> | Temp. (°C) | 11.52                 | 12.65                 | 0.92     | 0.94       | 1.13      |
|                    | RH (%)     | 67.44                 | 71.46                 | 0.81     | 0.89       | 4.02      |
|                    | WS (m/s)   | 0.94                  | 1.63                  | 0.53     | 0.63       | 0.69      |

**Table S8.** Statistical measures for model performance evaluation discussed in this paper.

| Statistic/abbreviation        | Formula                                                                                                                           | Description                                                                                                                                                                                             |
|-------------------------------|-----------------------------------------------------------------------------------------------------------------------------------|---------------------------------------------------------------------------------------------------------------------------------------------------------------------------------------------------------|
| Correlation Coefficient (R)   | $\frac{\sum_{i=1}^n (M_i - \bar{M})(O_i - \bar{O})}{\sqrt{\sum_{i=1}^n (M_i - \bar{M})^2} \sqrt{\sum_{i=1}^n (O_i - \bar{O})^2}}$ | <ul style="list-style-type: none"> <li>- Unitless, <math>-1 \leq R \leq +1</math></li> <li>- <math>R = 1</math> is perfect correlation</li> <li>- <math>R = 0</math> is totally uncorrelated</li> </ul> |
| Index Of Agreement (IOA)      | $1 - \left[ \frac{\sum_{i=1}^n (O_i - M_i)^2}{\sum_{i=1}^n ( M_i - \bar{O}  +  O_i - \bar{O} )^2} \right]$                        | <ul style="list-style-type: none"> <li>- Unitless, <math>0 \leq IOA \leq 1</math> (Willmott, 1984)</li> <li>- IOA value closer to 1 indicates better prediction</li> </ul>                              |
| Mean Bias (MB)                | $\frac{\sum_{i=1}^n (M_i - O_i)}{n}$                                                                                              | <ul style="list-style-type: none"> <li>- Concentration units</li> </ul>                                                                                                                                 |
| Root Mean Square Error (RMSE) | $\sqrt{\frac{\sum_{i=1}^n (M_i - O_i)^2}{n}}$                                                                                     | <ul style="list-style-type: none"> <li>- Concentration units</li> </ul>                                                                                                                                 |
| Normalized Mean Bias (NMB)    | $\frac{\sum_{i=1}^n (M_i - O_i)}{\sum_{i=1}^n O_i} \times 100(\%)$                                                                | <ul style="list-style-type: none"> <li>- <math>-100\% \leq NMB \leq +\infty</math></li> </ul>                                                                                                           |

---

Where;

n = Total number of data  
 $M_i$  = Predicted values  
 $\bar{M}$  = Mean of the predicted values  
 $O_i$  = Observed values  
 $\bar{O}$  = Mean of the observed values

---

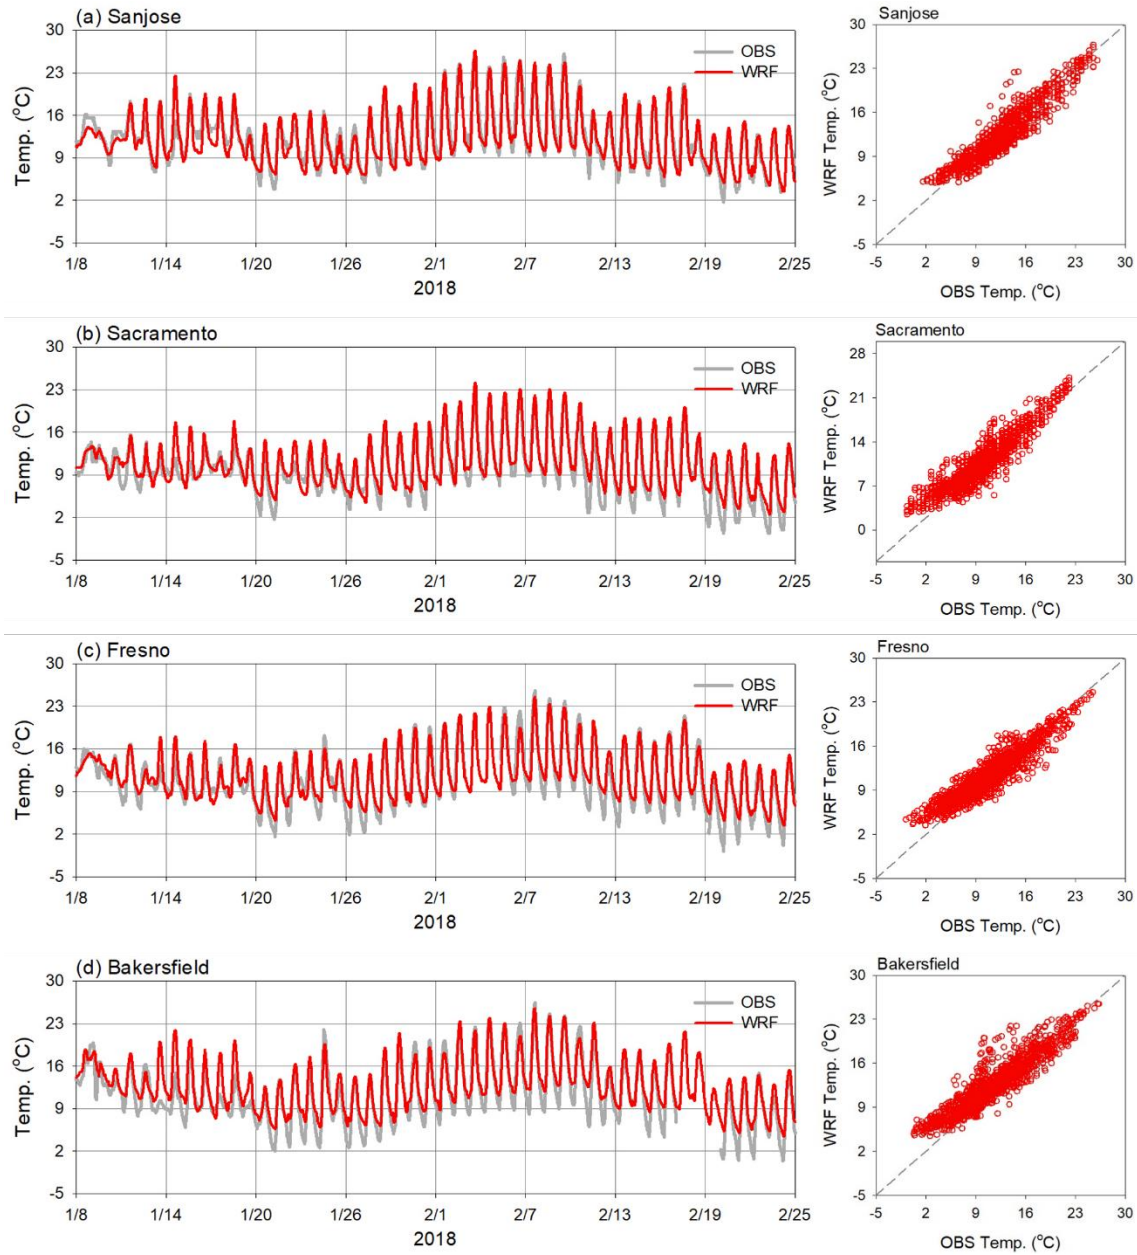

**Fig. S1.** Time series and scatter plots of hourly observed and simulated surface temperature at each site between January and February in 2018.

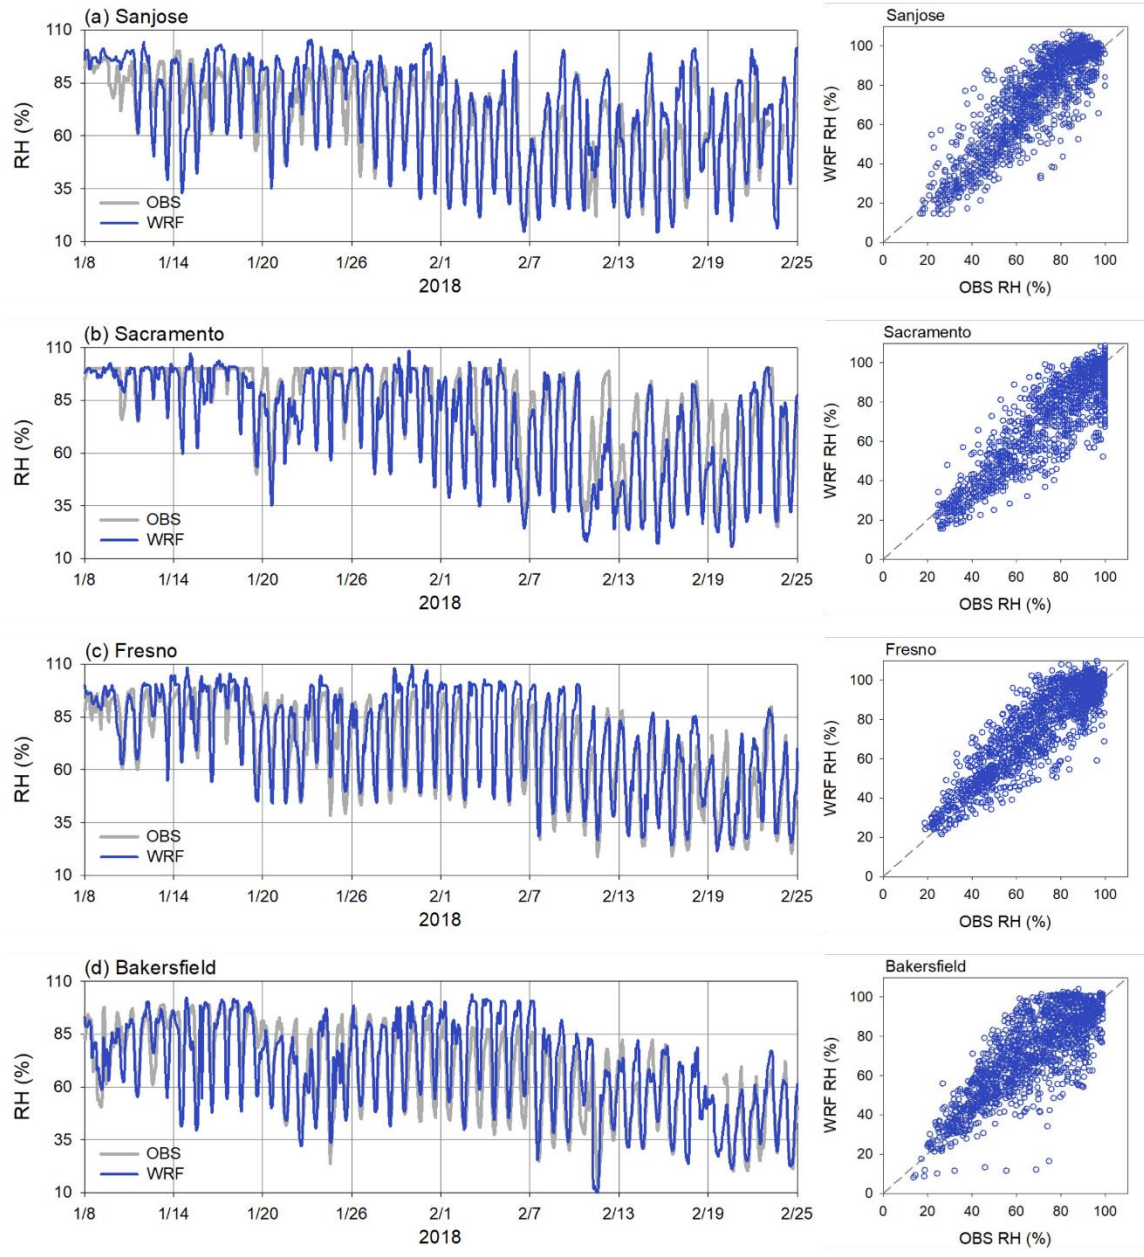

**Fig. S2.** Time series and scatter plots of hourly observed and simulated surface relative humidity at each site between January and February in 2018.

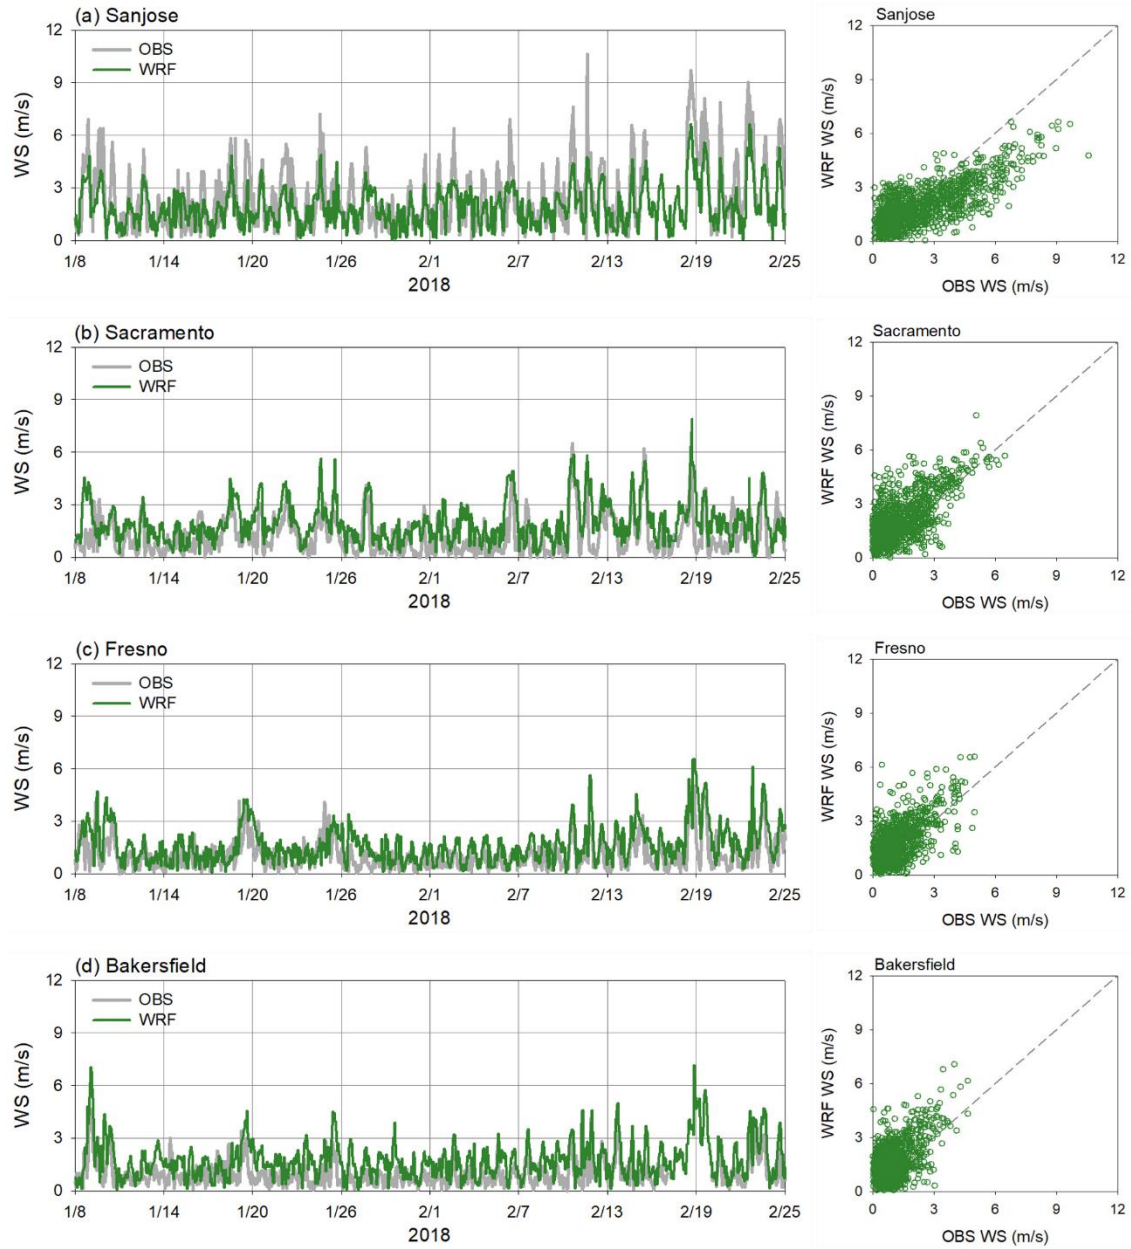

**Fig. S3.** Time series and scatter plots of hourly observed and simulated surface wind speed at each site between January and February in 2018.

(a) San Jose (OBS)

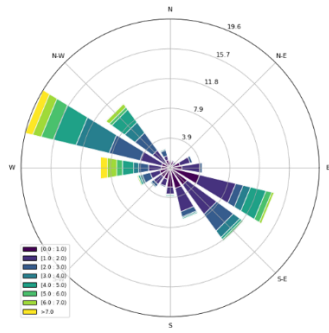

(e) San Jose (WRF)

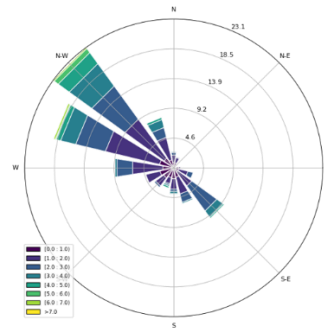

(b) Sacramento (OBS)

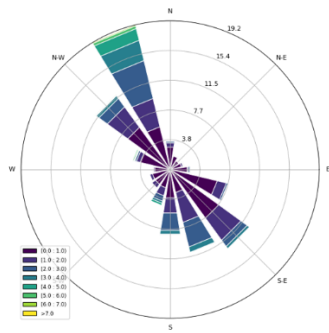

(f) Sacramento (WRF)

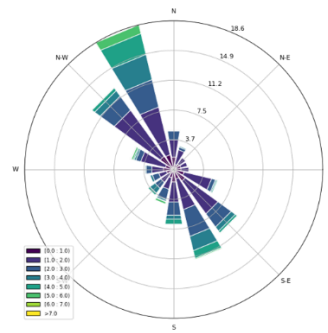

(c) Fresno (OBS)

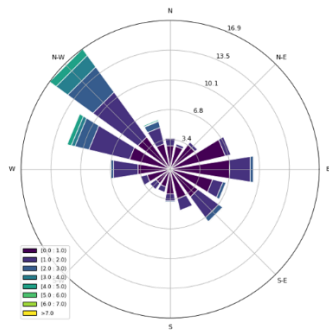

(g) Fresno (WRF)

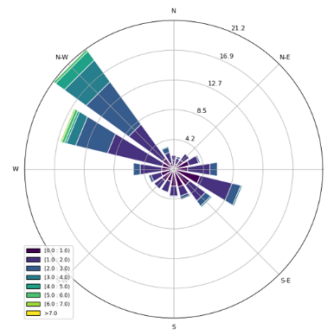

(d) Bakersfield (OBS)

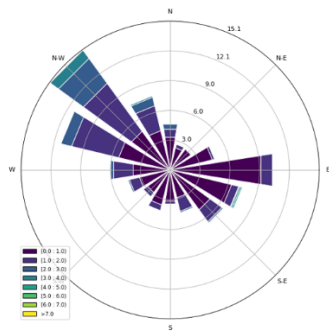

(h) Bakersfield (WRF)

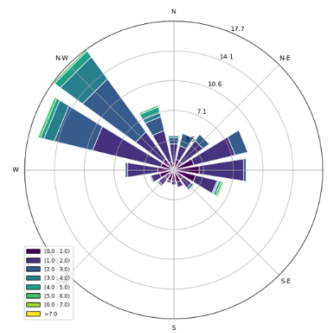

**Fig. S4.** Windrose plots of (a–d) observed and (e–h) simulated wind at each site between January and February in 2018.

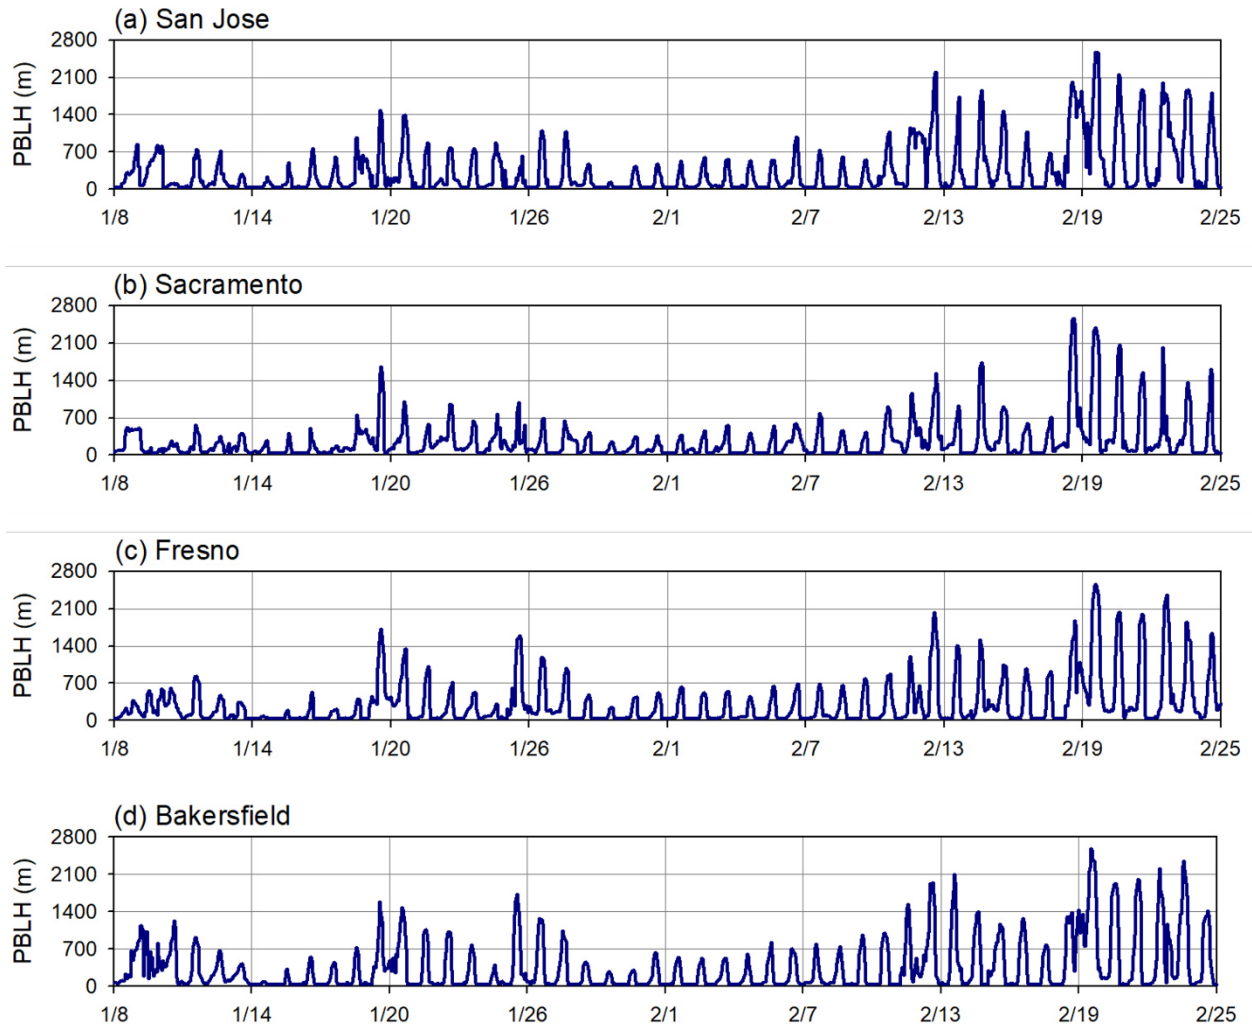

**Fig. S5.** Time series of hourly simulated PBL height at each site between January and February in 2018.

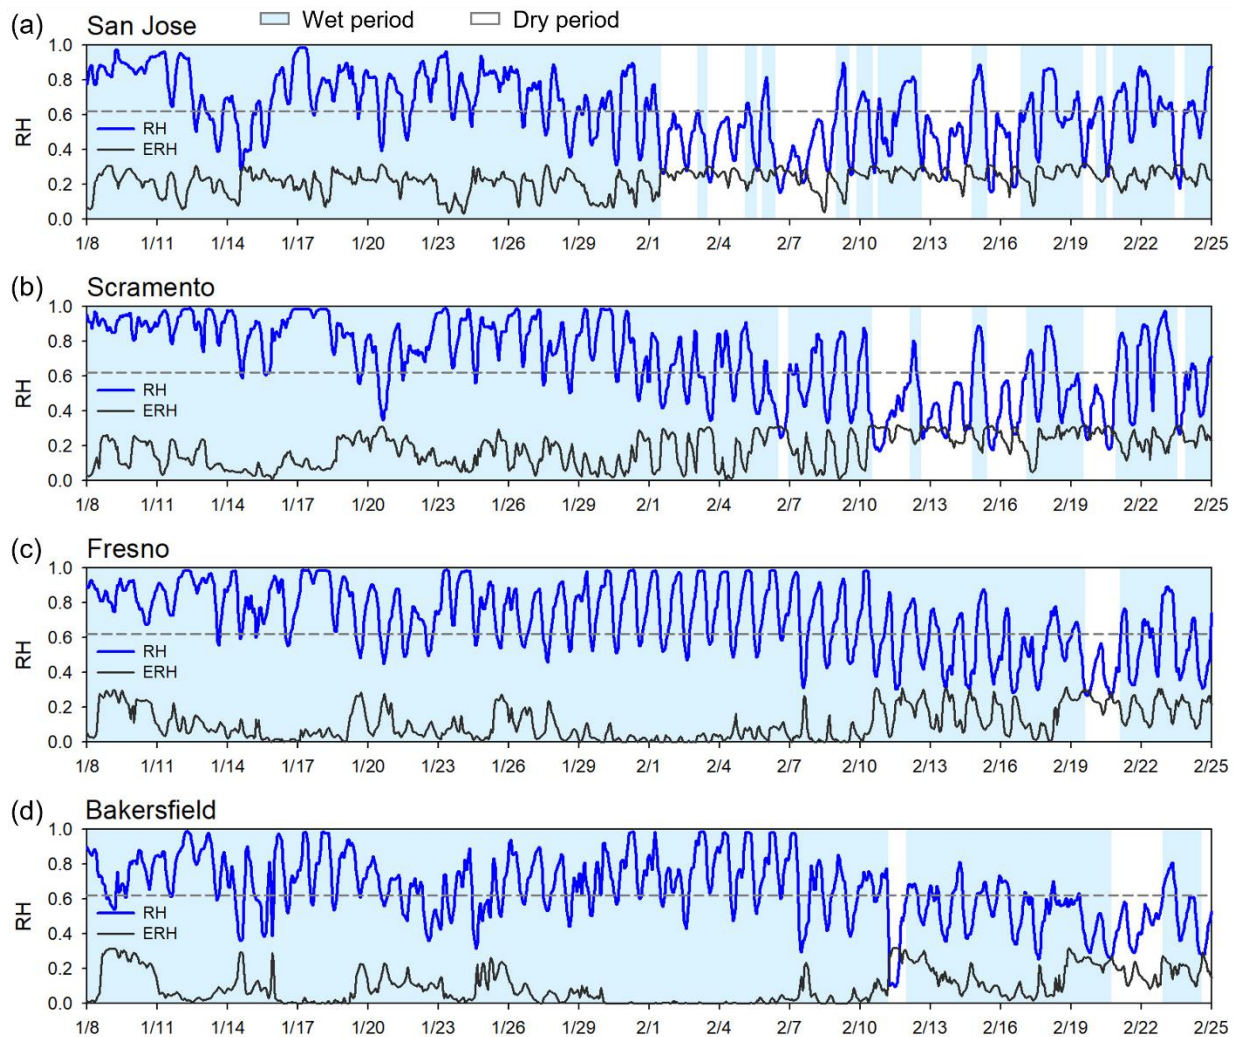

**Fig. S6.** Time series of hourly simulated RH and ERH. The dry and wet periods are determined by comparing RH with ERH and DRH. Anion is dominated by nitrate and DRH is almost constant nearly at 0.62.



**Section S4. Time series and spatial distributions of the predicted concentrations of gas species (ozone, nitrate radicals, and SOA precursor hydrocarbons), time series of emissions of SOA precursor hydrocarbons, and time series of SOA species in the UNIPAR model.**

(a) NO<sub>2</sub>

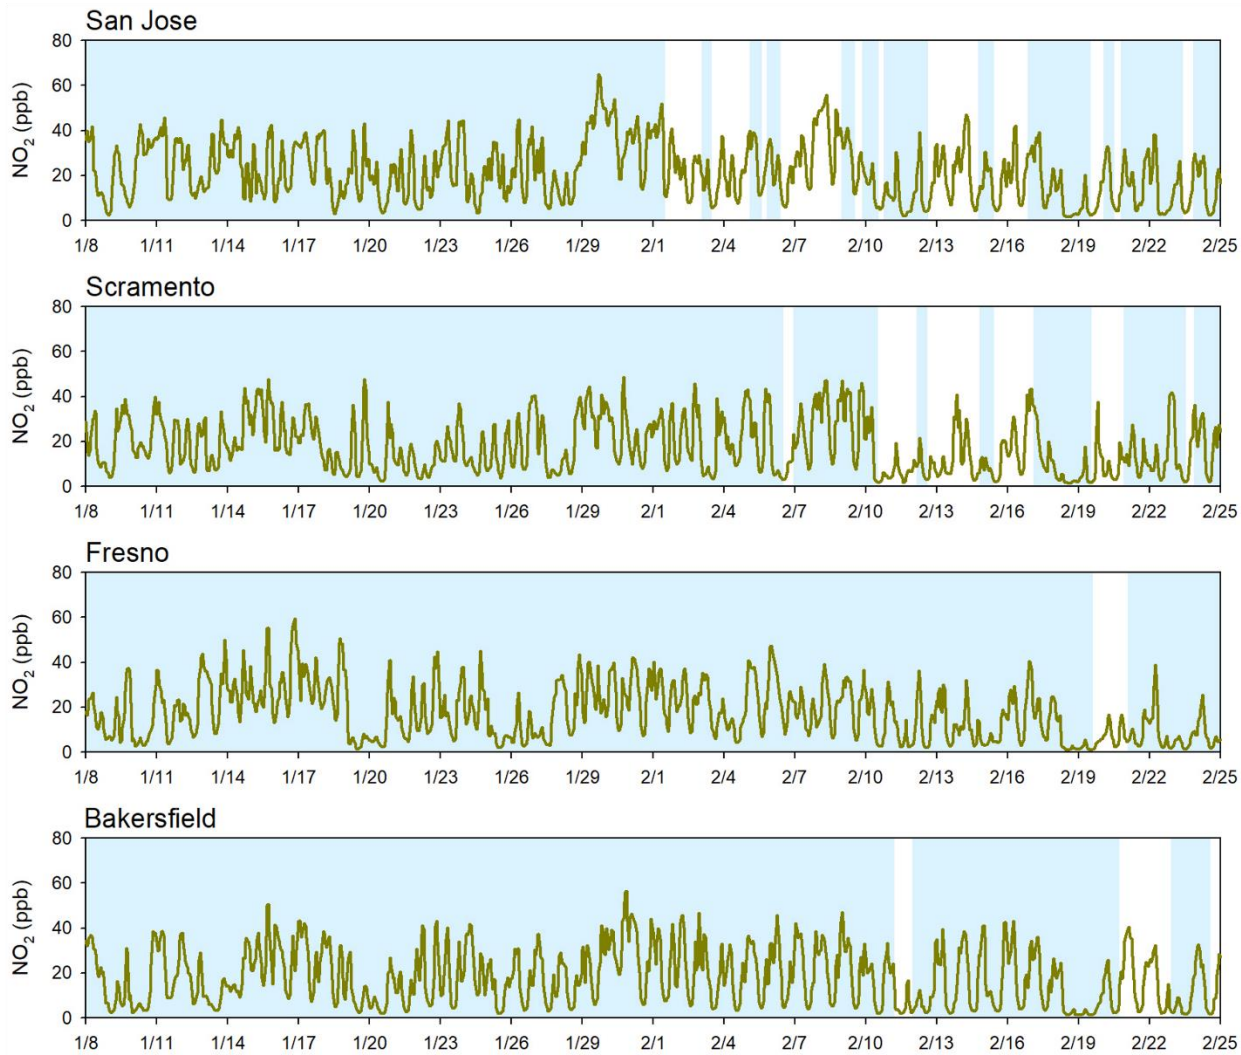

**Fig. S7.** Time series of hourly simulated (a) NO<sub>2</sub>, (b) O<sub>3</sub>, and (c) nitrate radicals at each site between January and February in 2018.

(b) O<sub>3</sub>

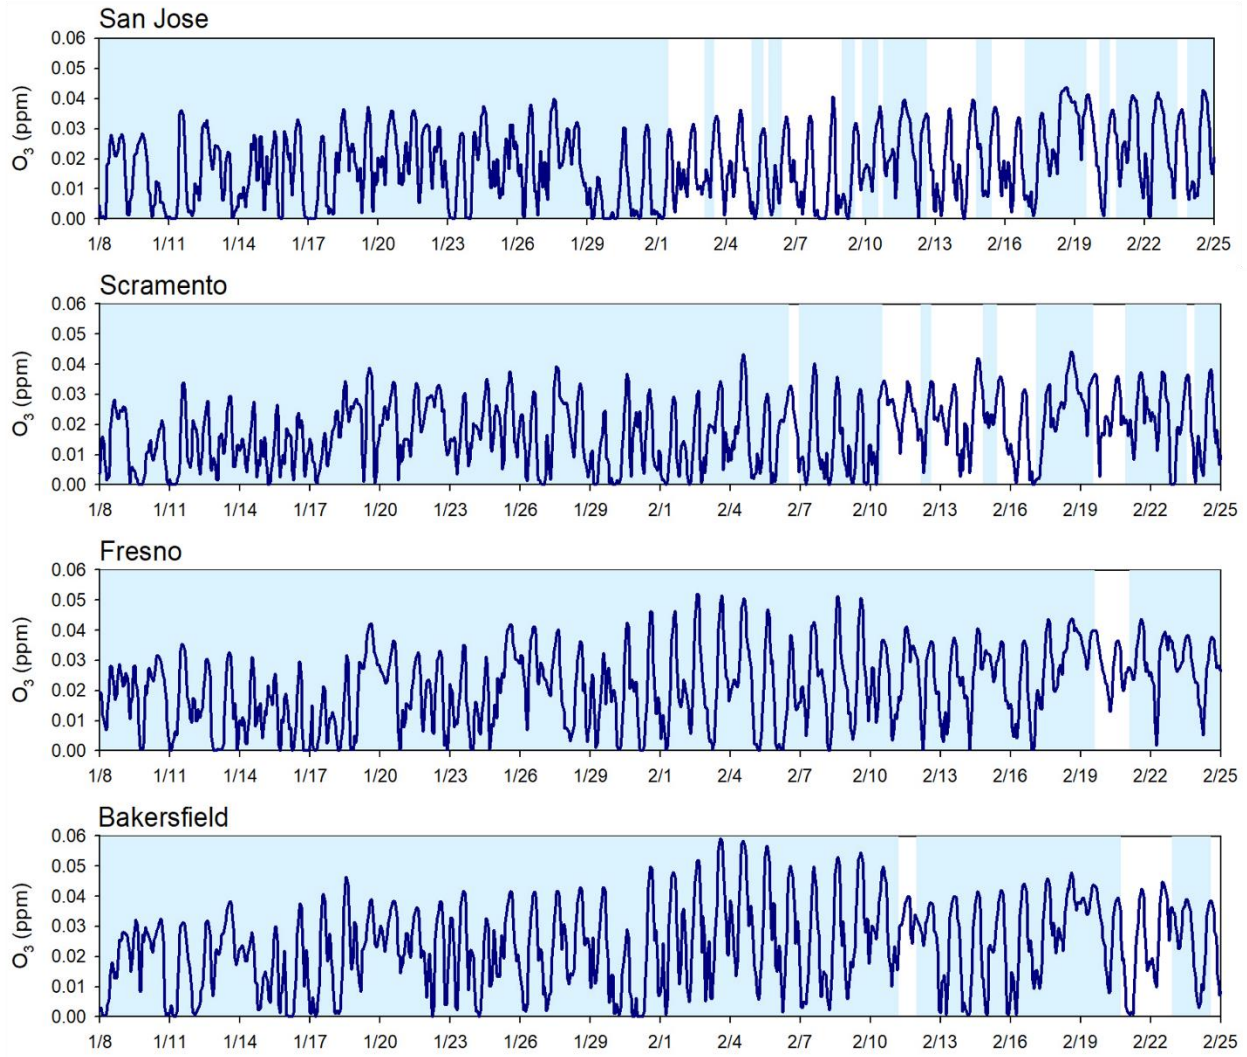

Fig. S7. (Continued)

(c) NO<sub>3</sub>

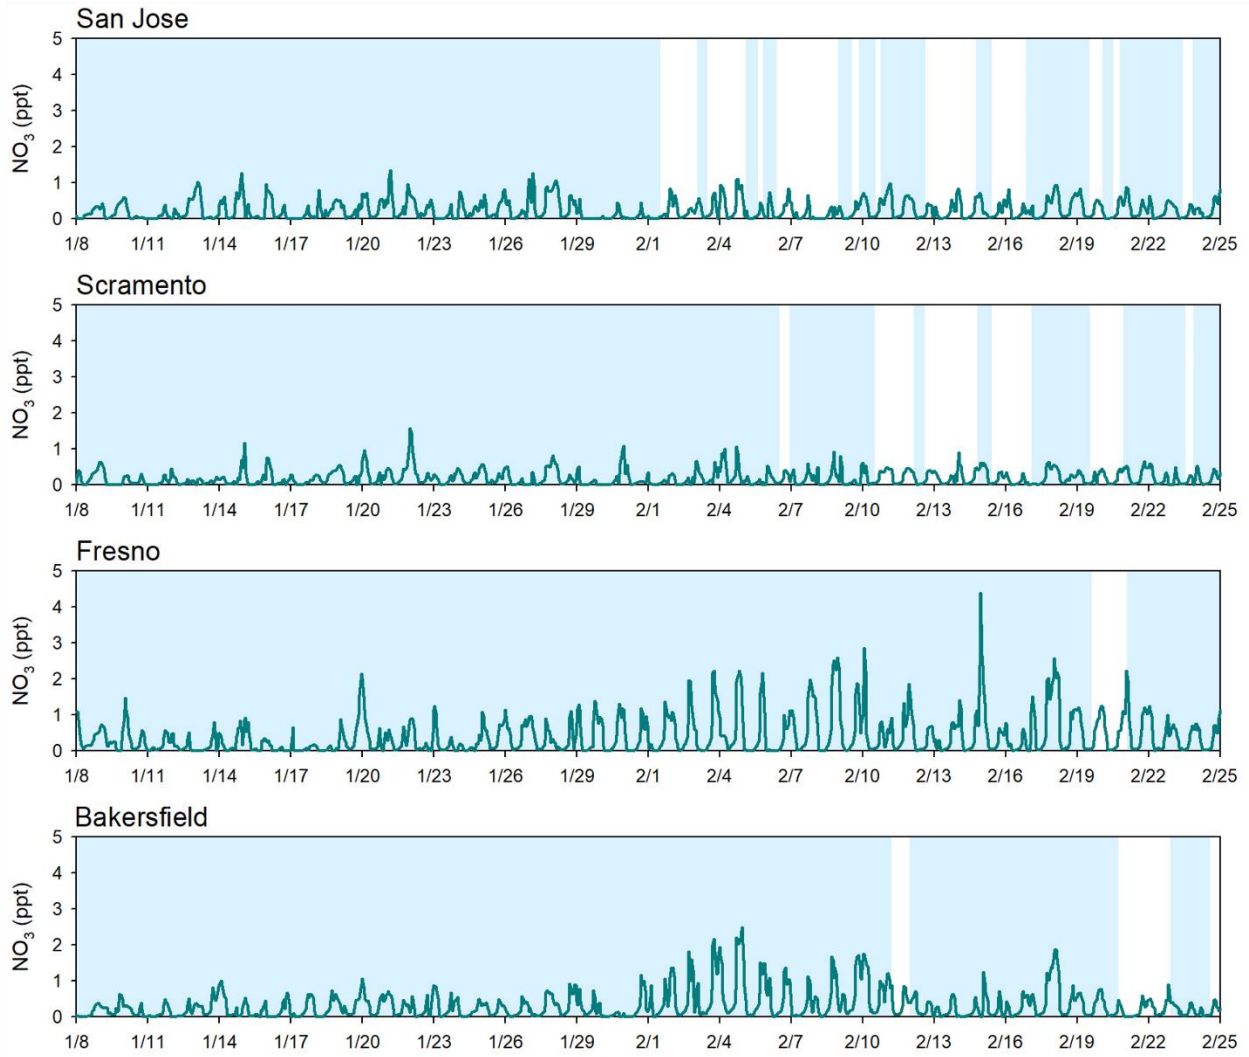

Fig. S7. (Continued)

(a) ARO

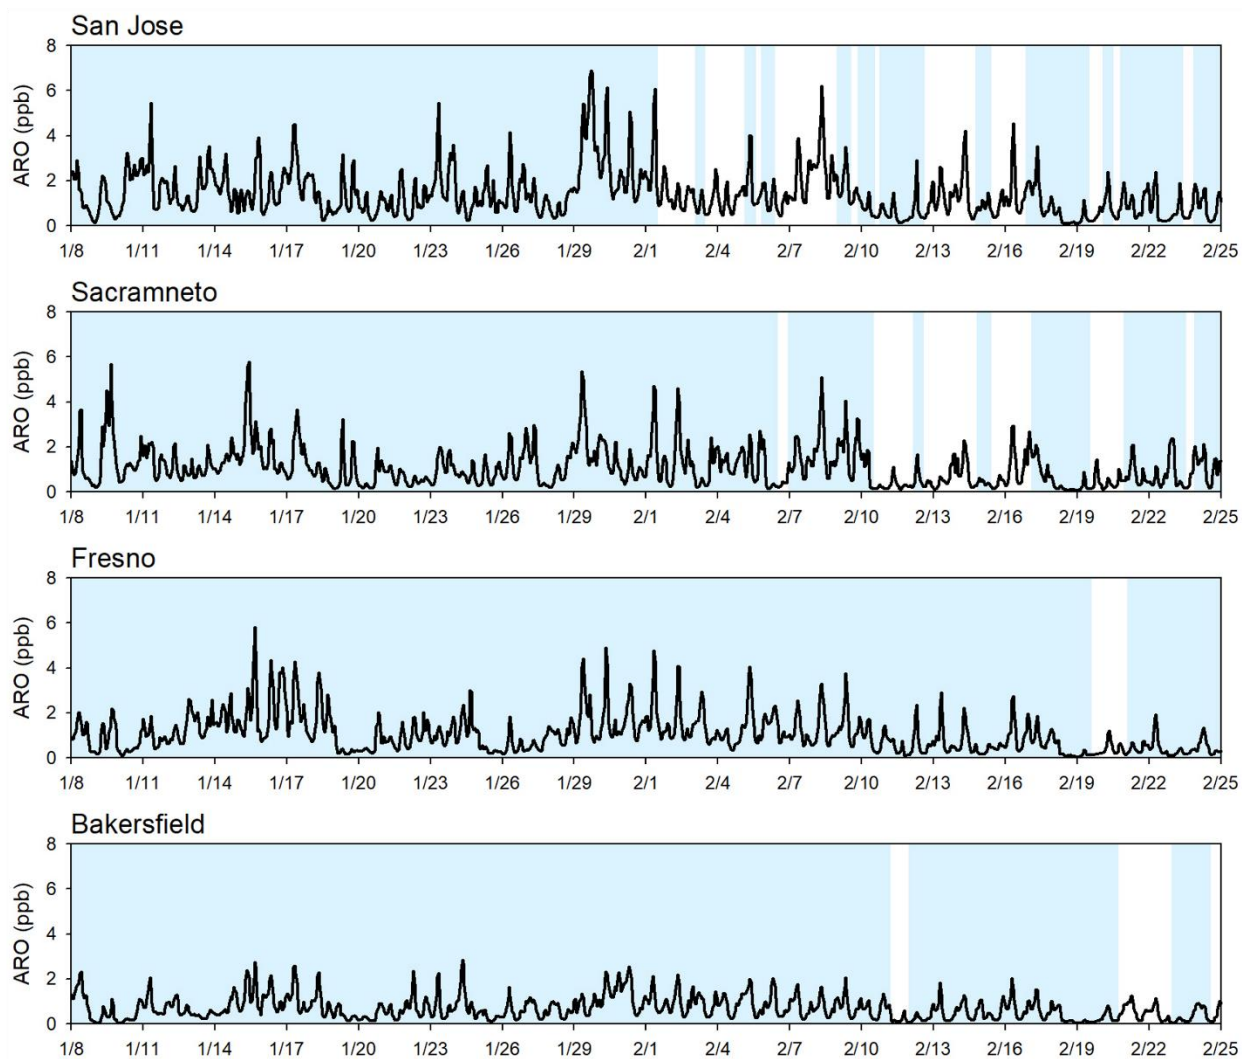

**Fig. S8.** Time series of hourly simulated SOA precursor hydrocarbons, (a) ARO, (b) ALK5, (c) TERP, (d) SESQ, and (e) ISOP at each site between January and February in 2018. ARO is the sum of benzene, toluene, o-xylene, p-xylene, m-xylene, and 1,2,4-trimethylbenzene.

(b) ALK5

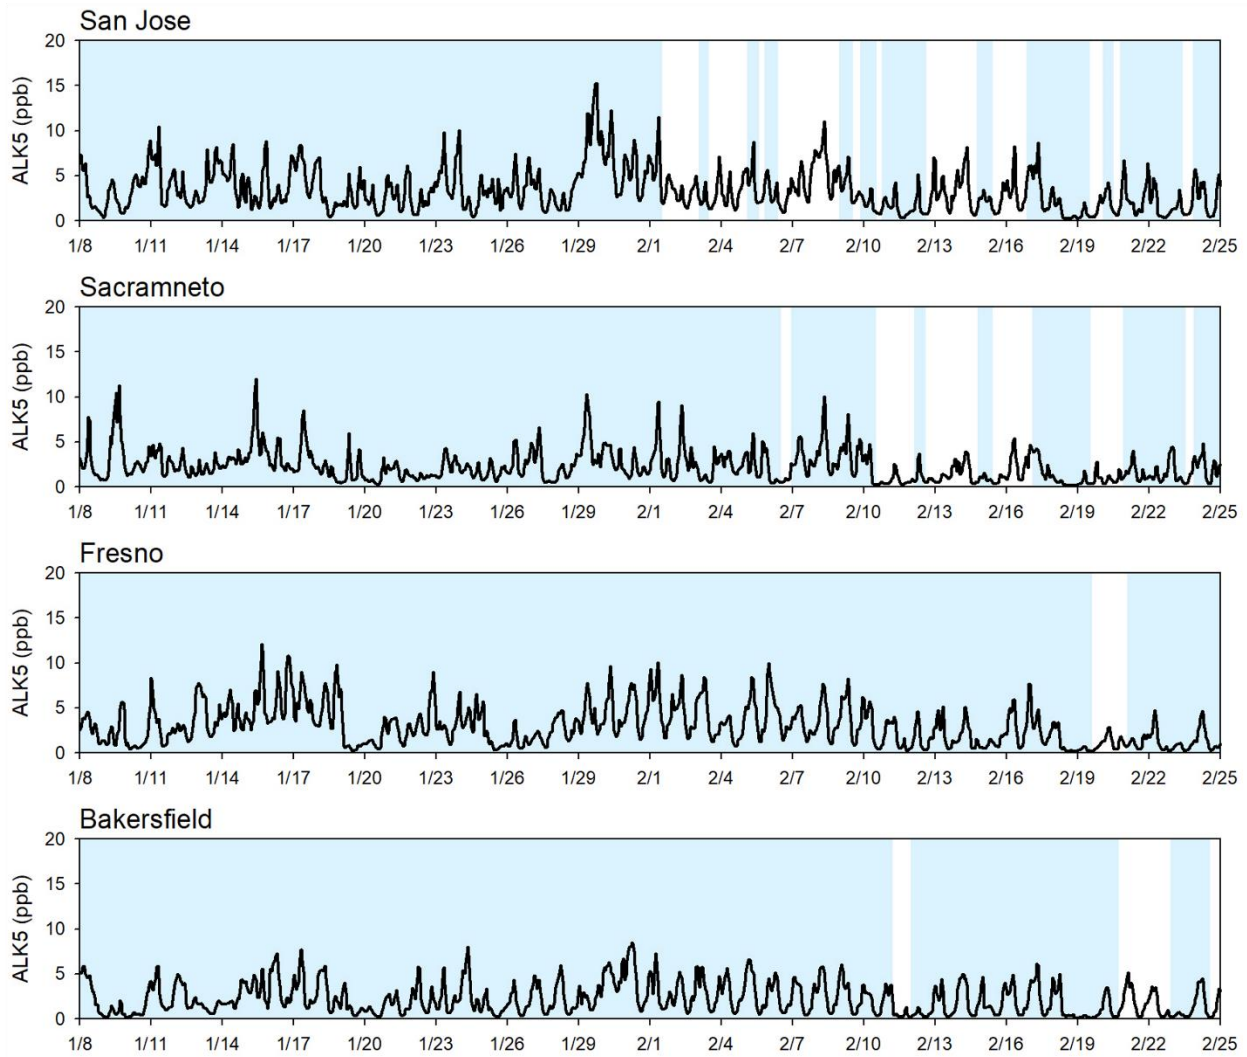

Fig. S8. (Continued)

(c) TERP

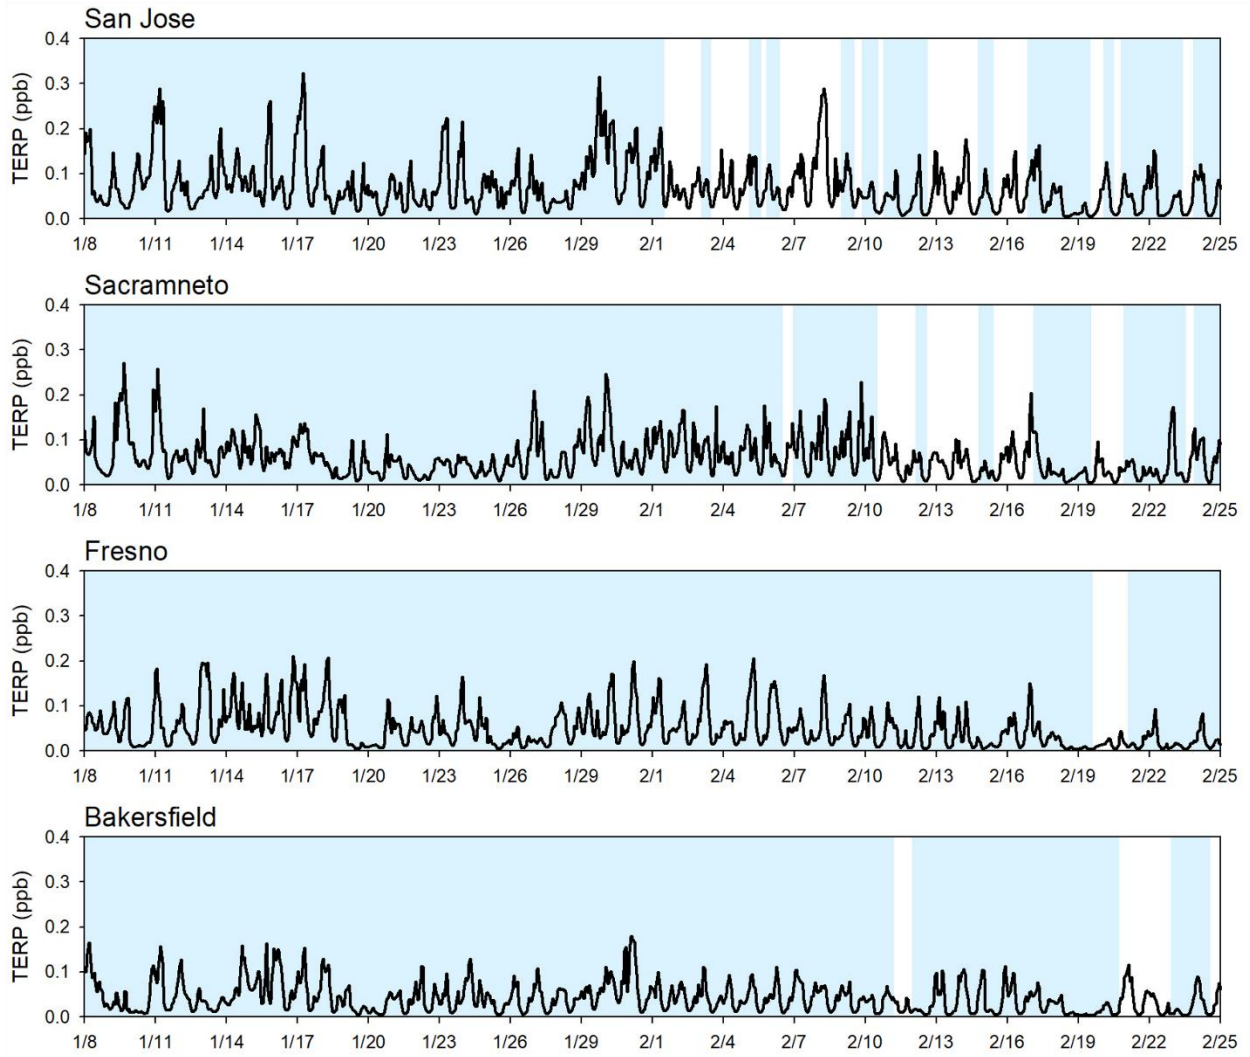

Fig. S8. (Continued)

(d) SESQ

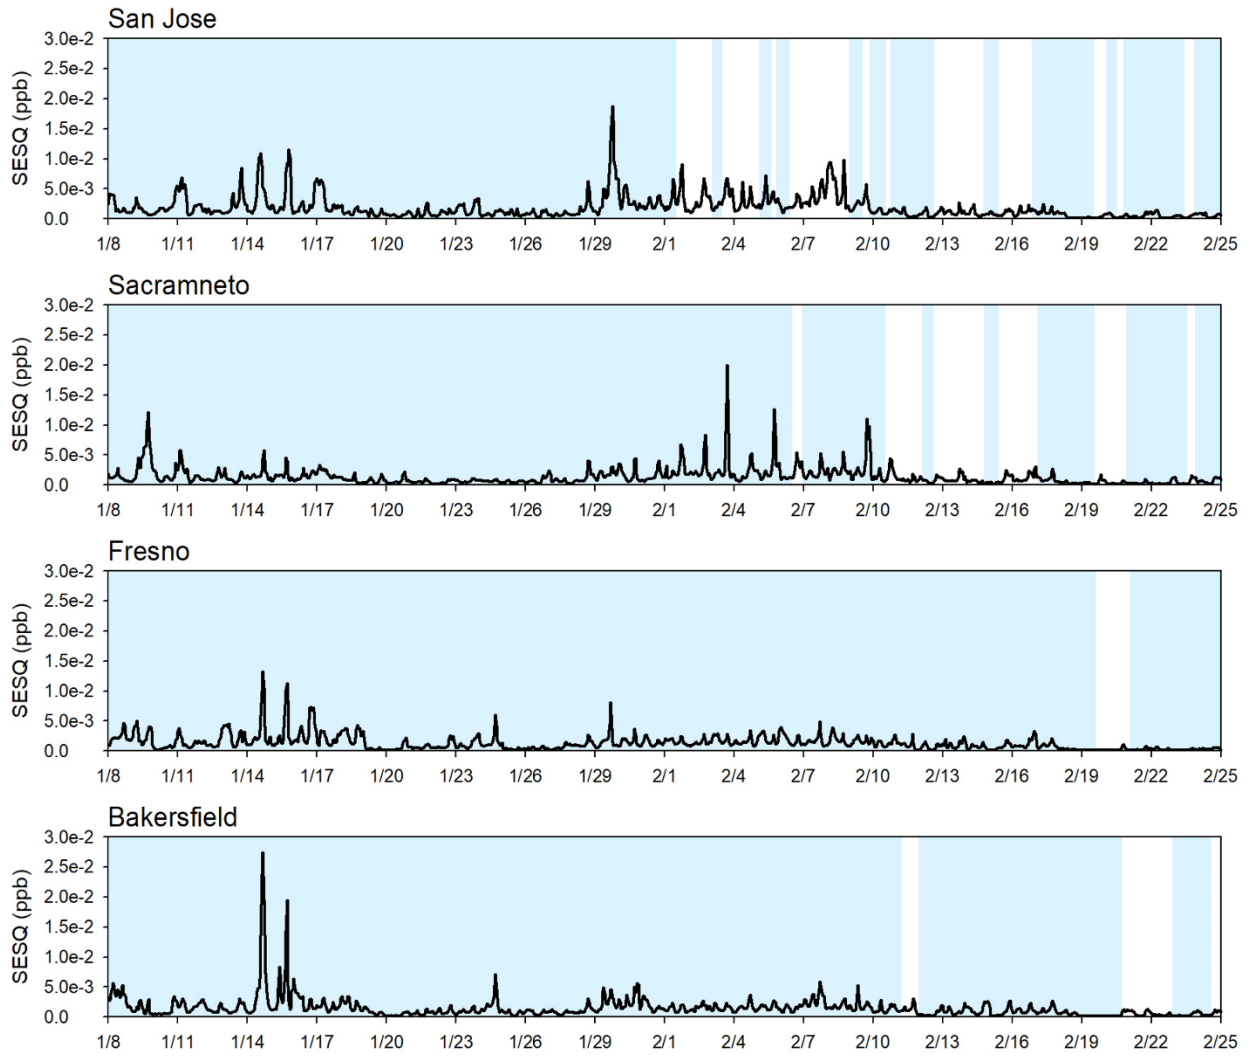

Fig. S8. (Continued)

(e) ISOP

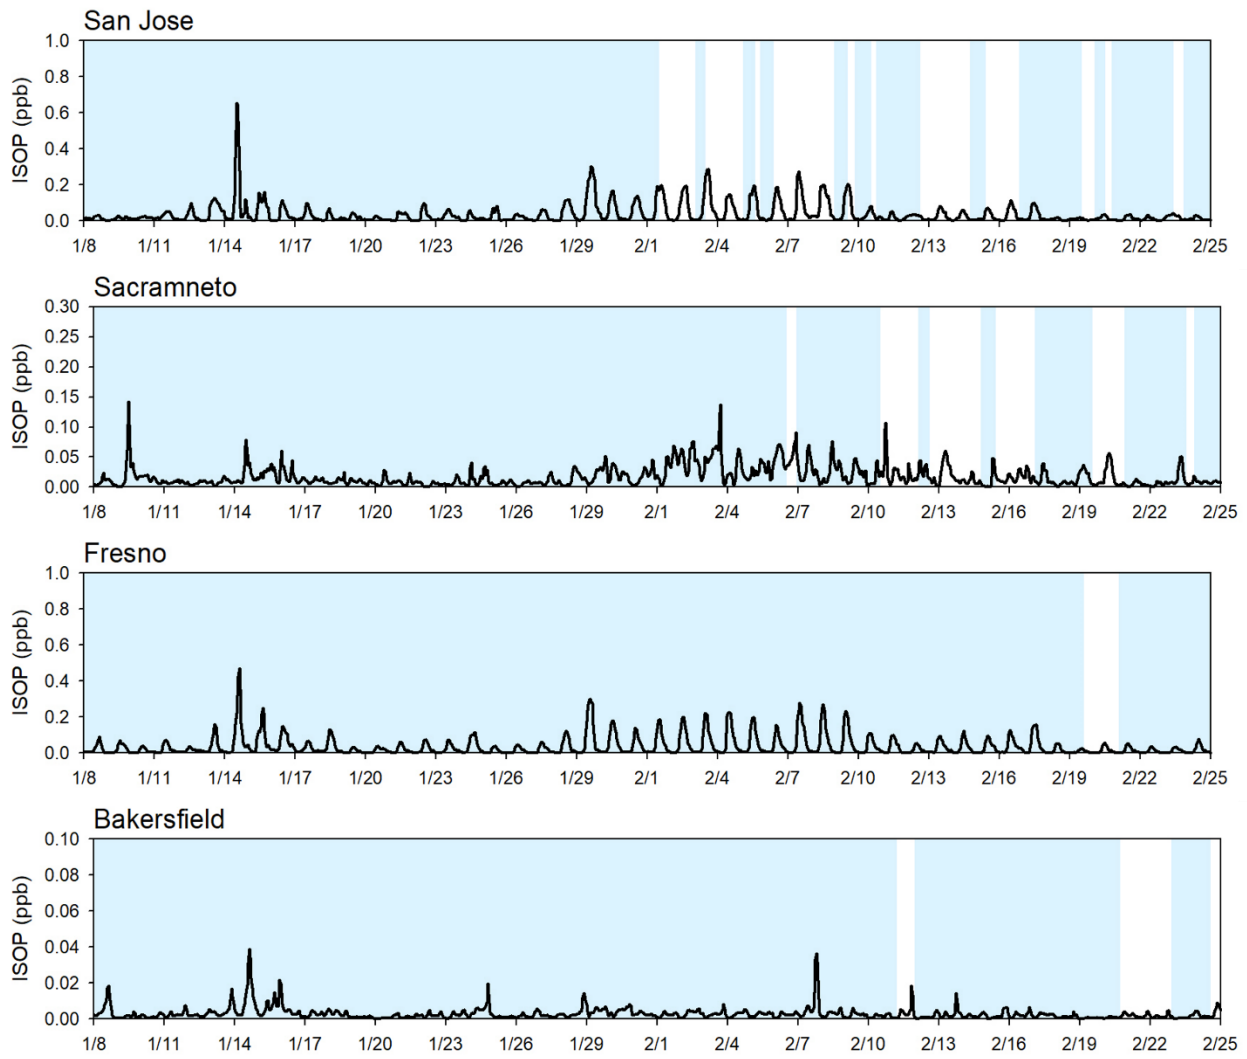

Fig. S8. (Continued)



(a) ARO

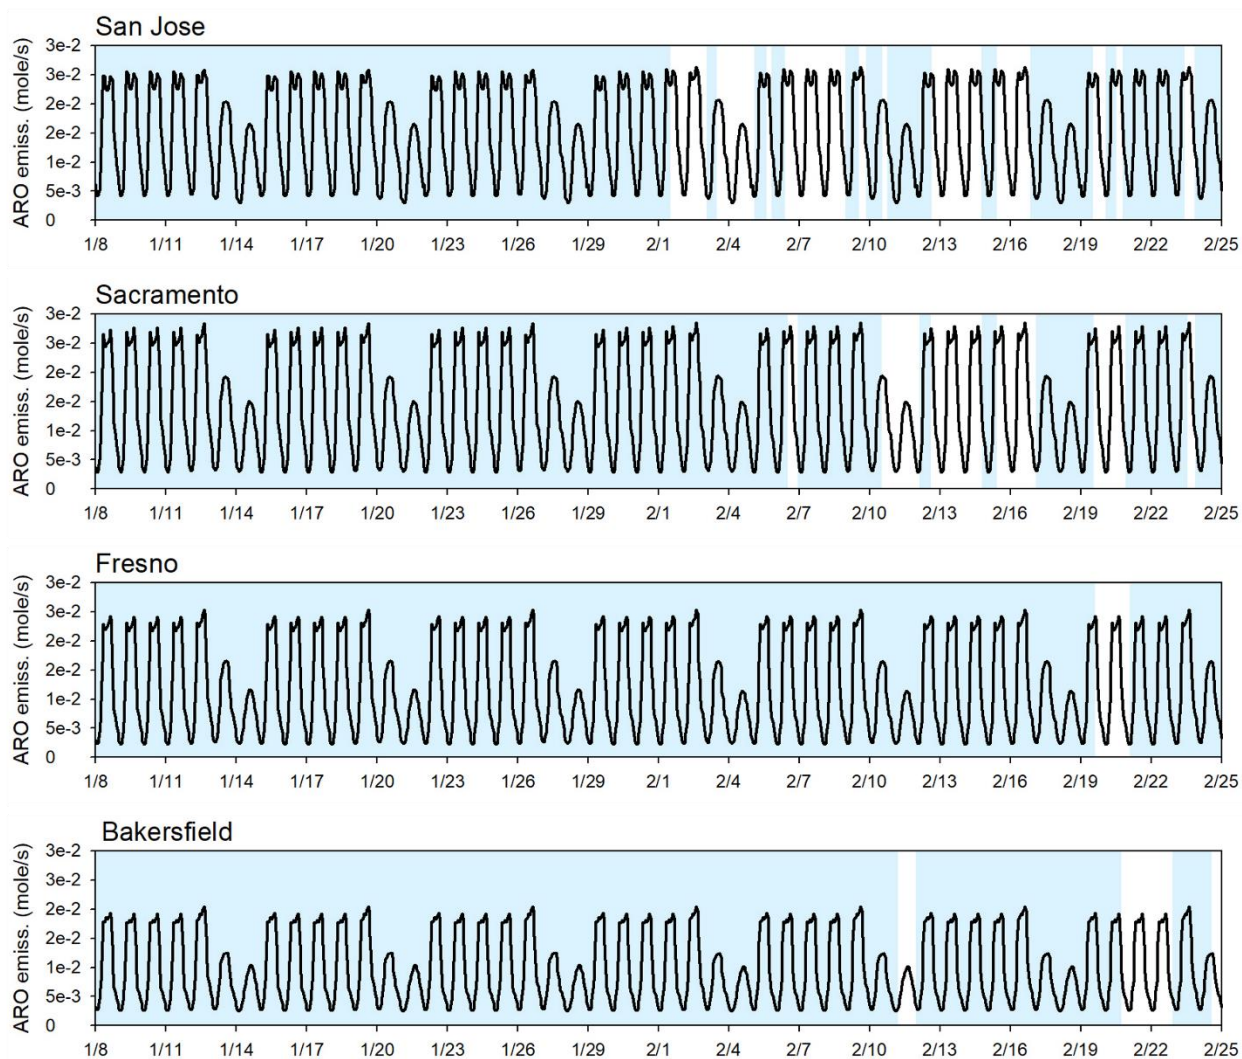

**Fig. S9.** Time series of emissions of SOA precursor hydrocarbons, (a) ARO, (b) ALK5, (c) TERP, (d) SESQ, and (e) ISOP at each site between January and February in 2018. ARO is the sum of benzene, toluene, o-xylene, p-xylene, m-xylene, and 1,2,4-trimethylbenzene.

(b) ALK5

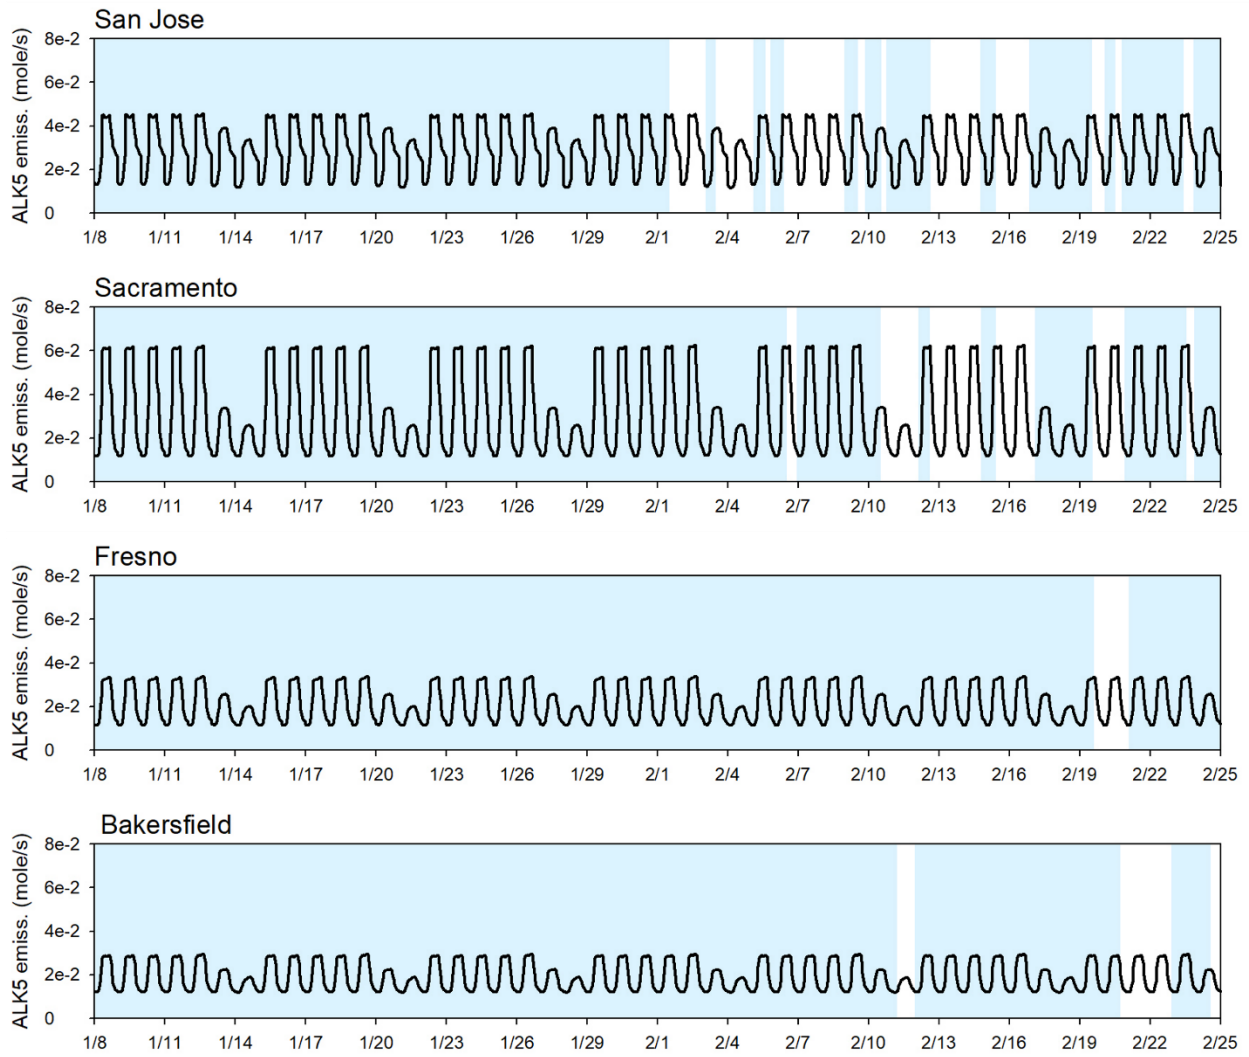

Fig. S9. (Continued)

(c) TERP

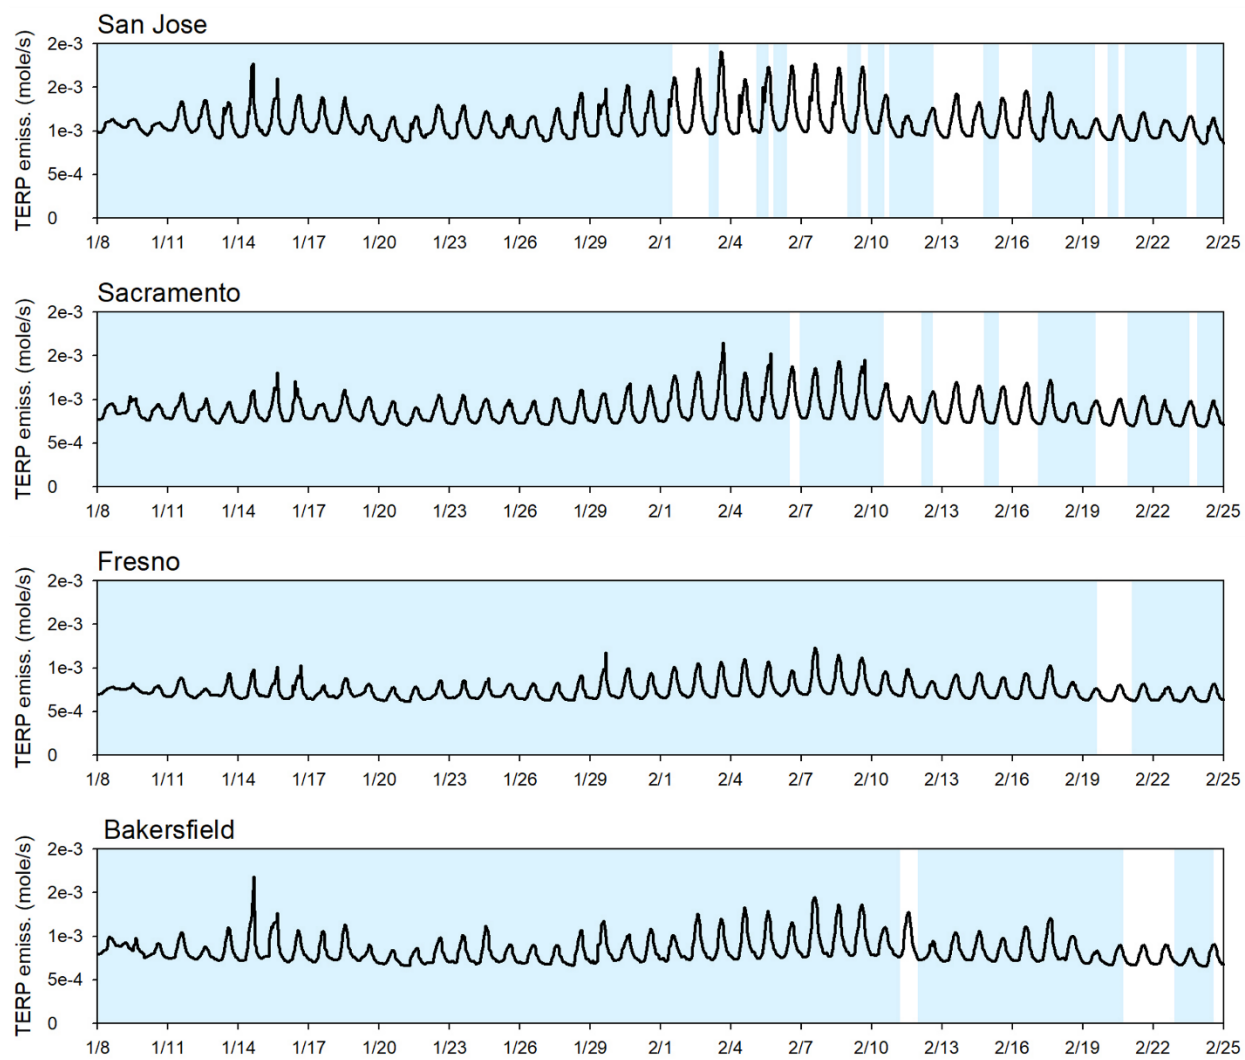

Fig. S9. (Continued)

(d) SESQ

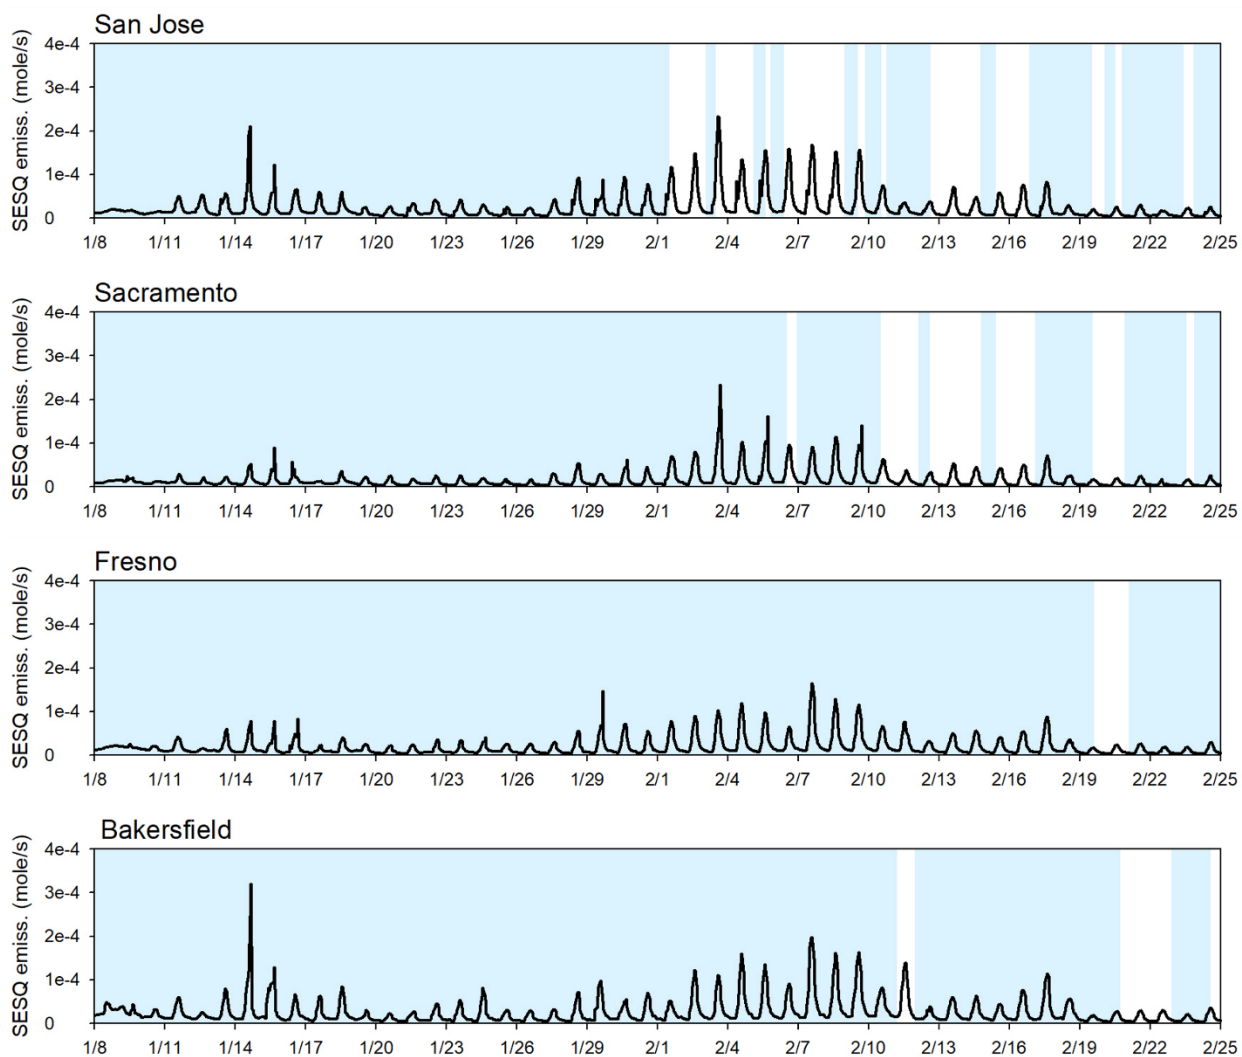

Fig. S9. (Continued)

(e) ISOP

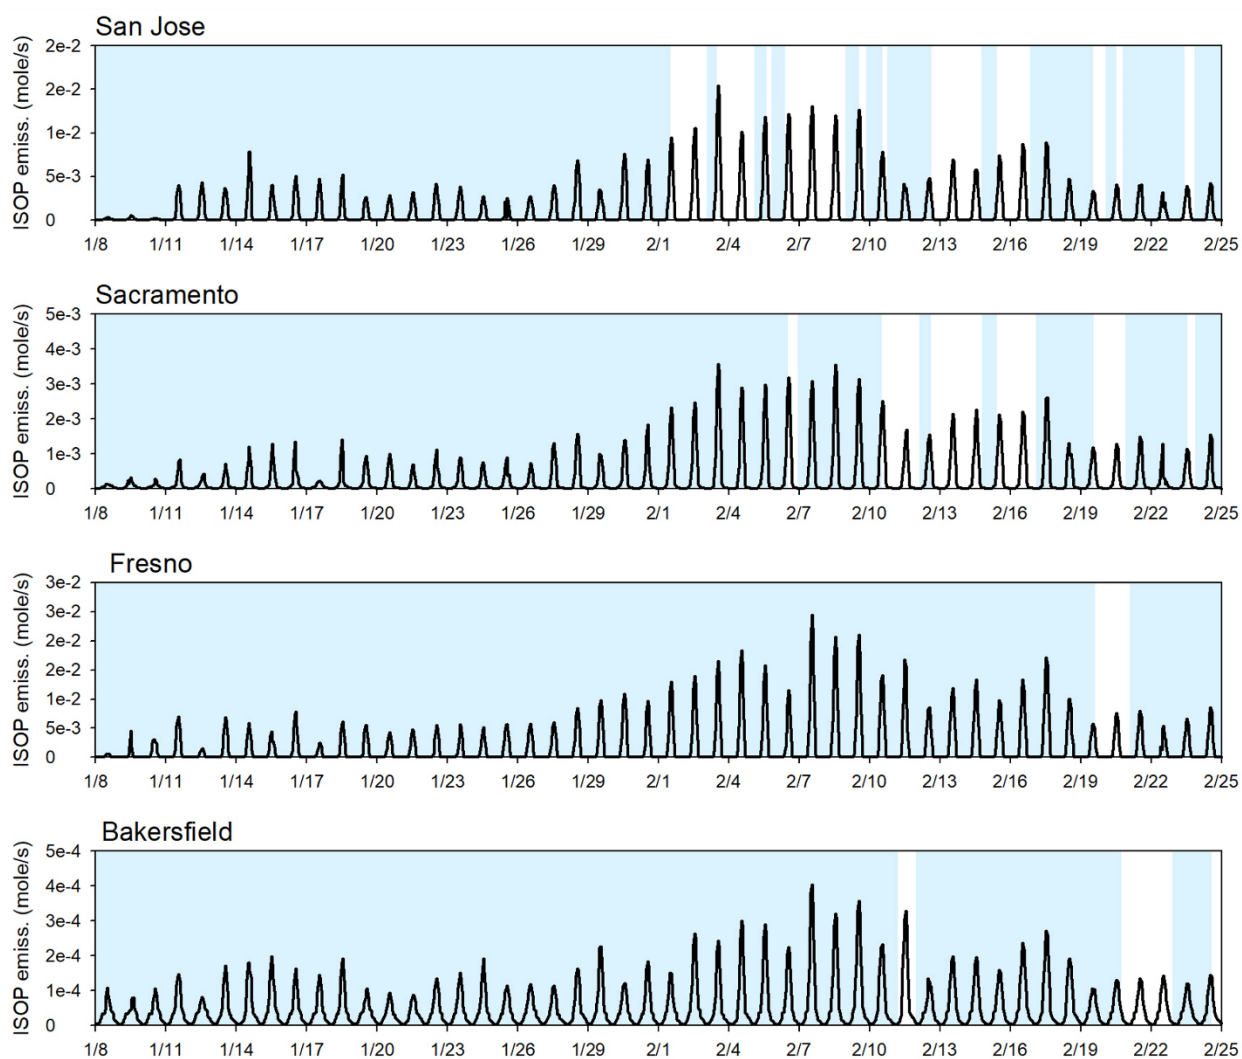

Fig. S9. (Continued)

(a) OM\_AR

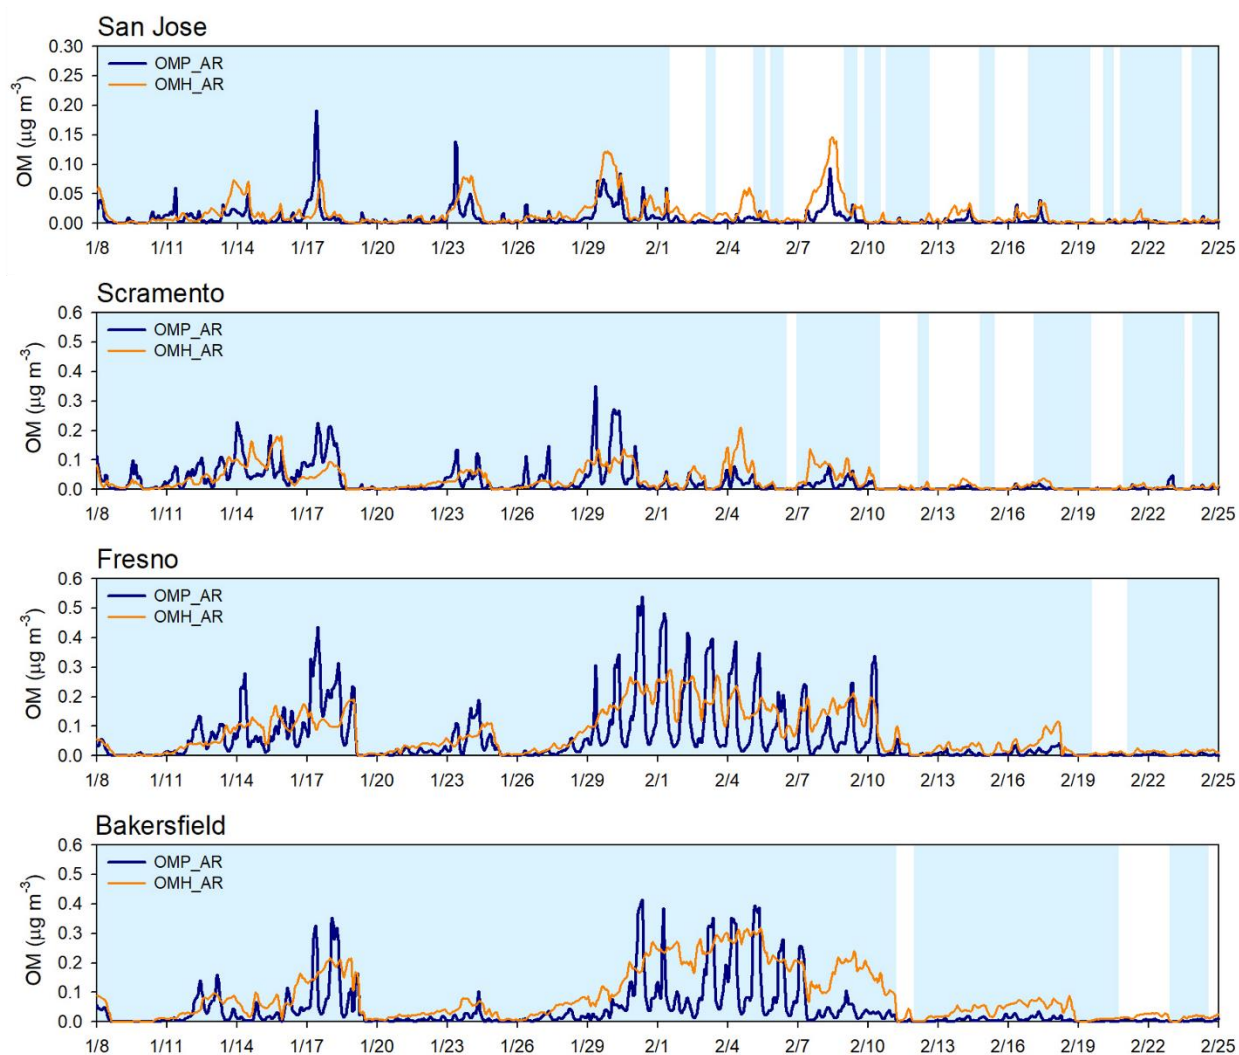

**Fig. S10.** Time series of hourly simulated SOA species in the UNIPAR model, (a) aromatic SOA, (b) alkane SOA, (c) terpene SOA, (d) sesquiterpene SOA, and (e) isoprene SOA at each site between January and February in 2018. The navy-blue line represents the partitioned SOA (OMP) and orange line represents the heterogeneously formed SOA (OMH).

(b) OM\_AK

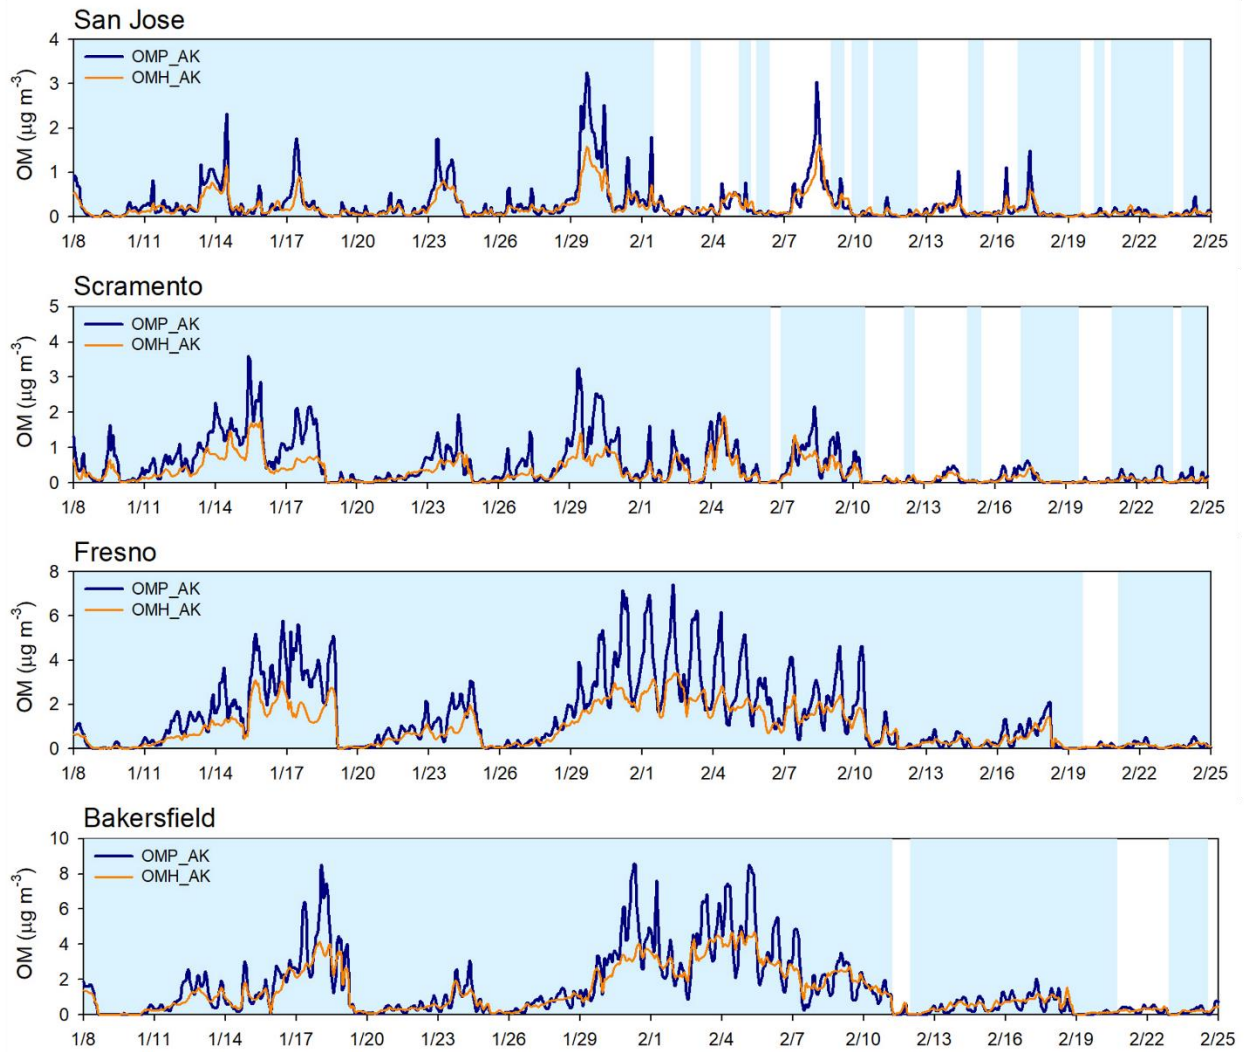

Fig. S10. (Continued)

(c) OM\_TE

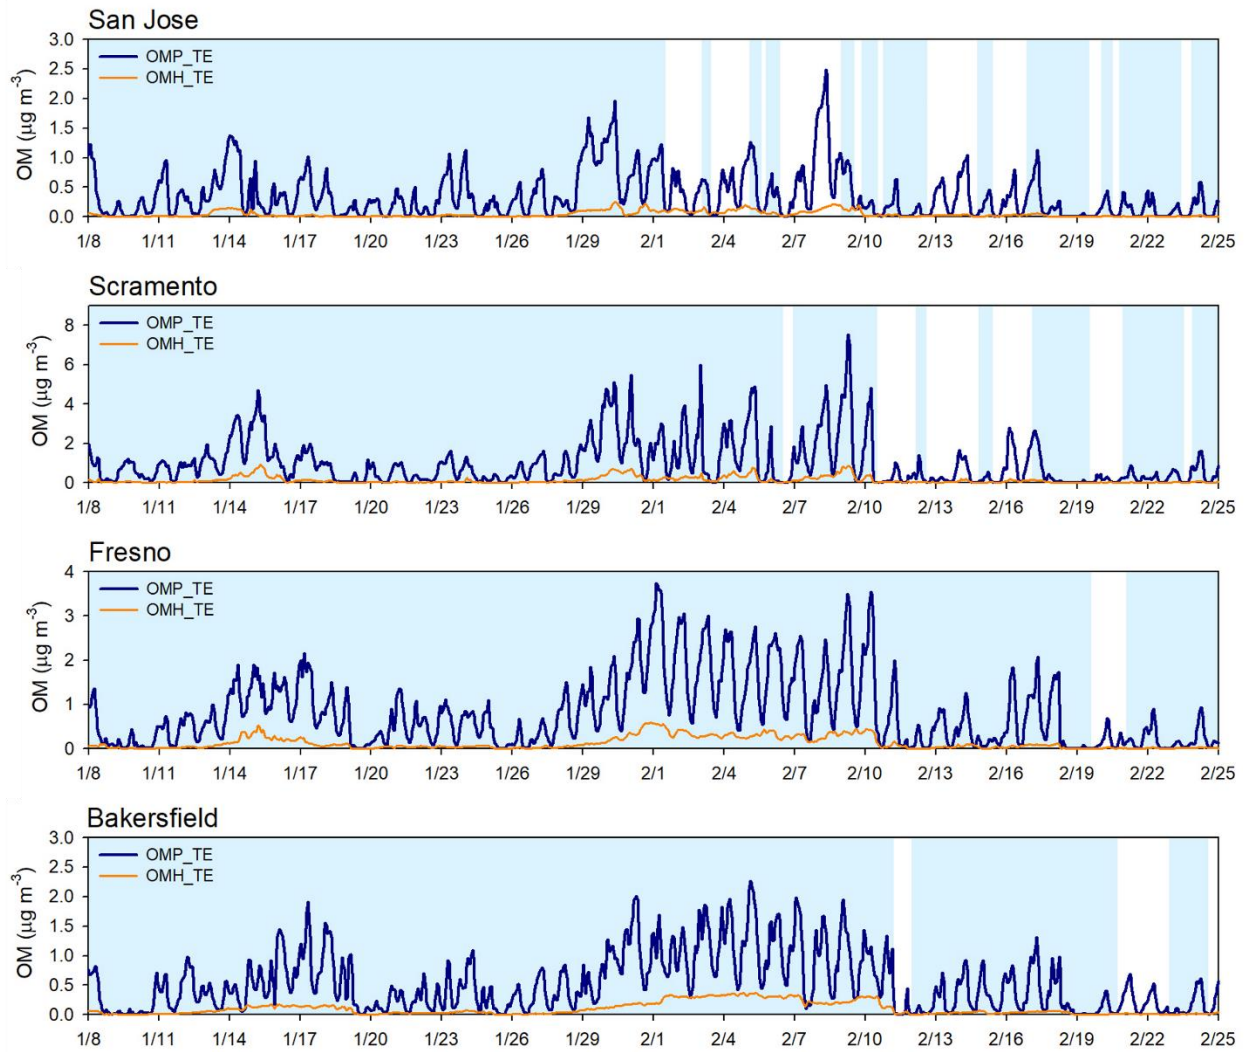

Fig. S10. (Continued)



(d) OM\_SP

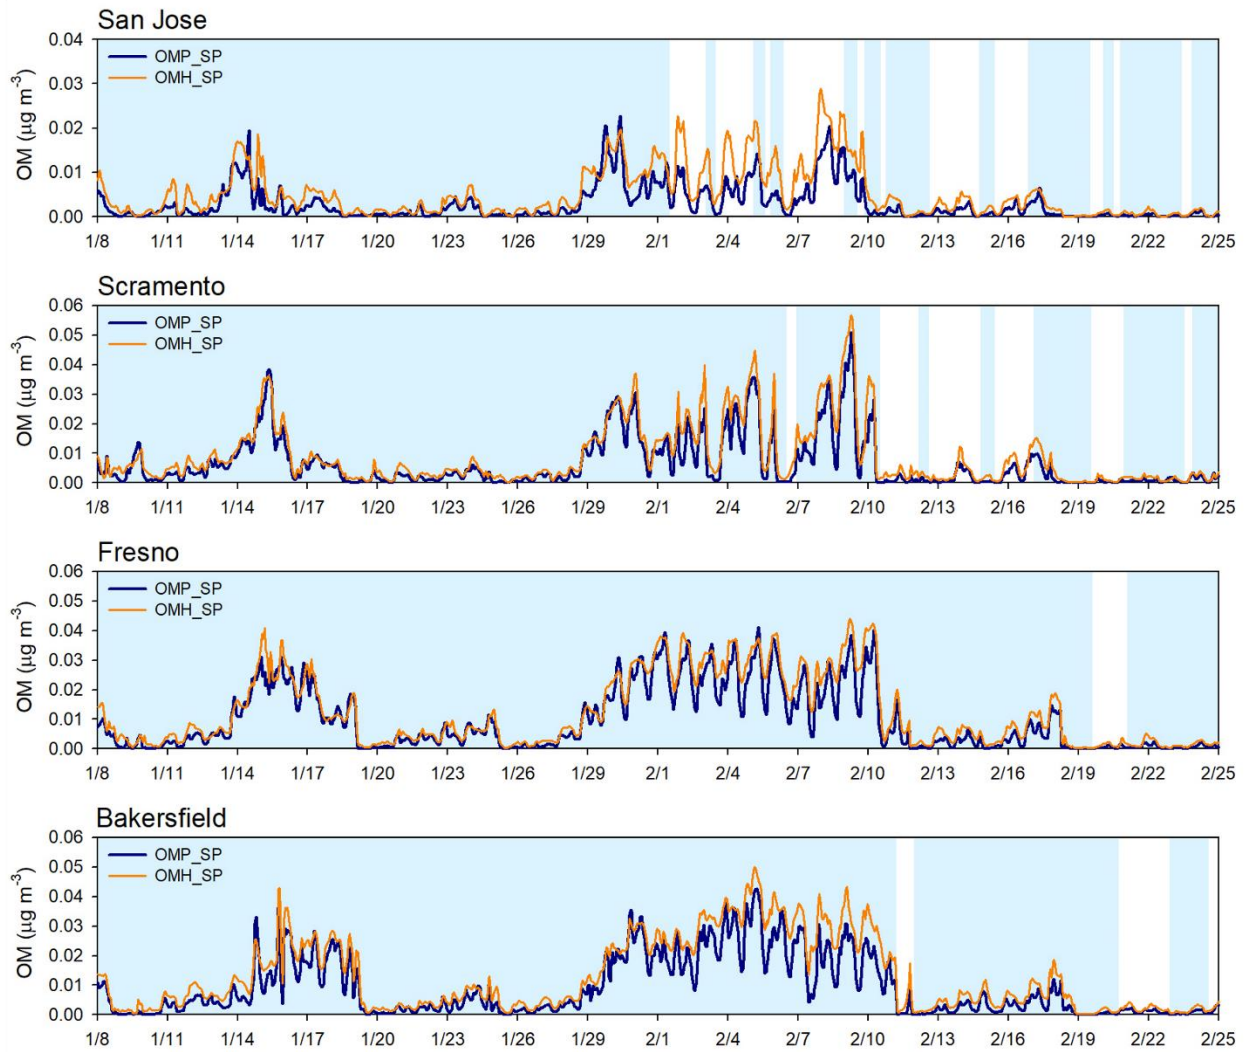

Fig. S10. (Continued)

(e) OM\_IS

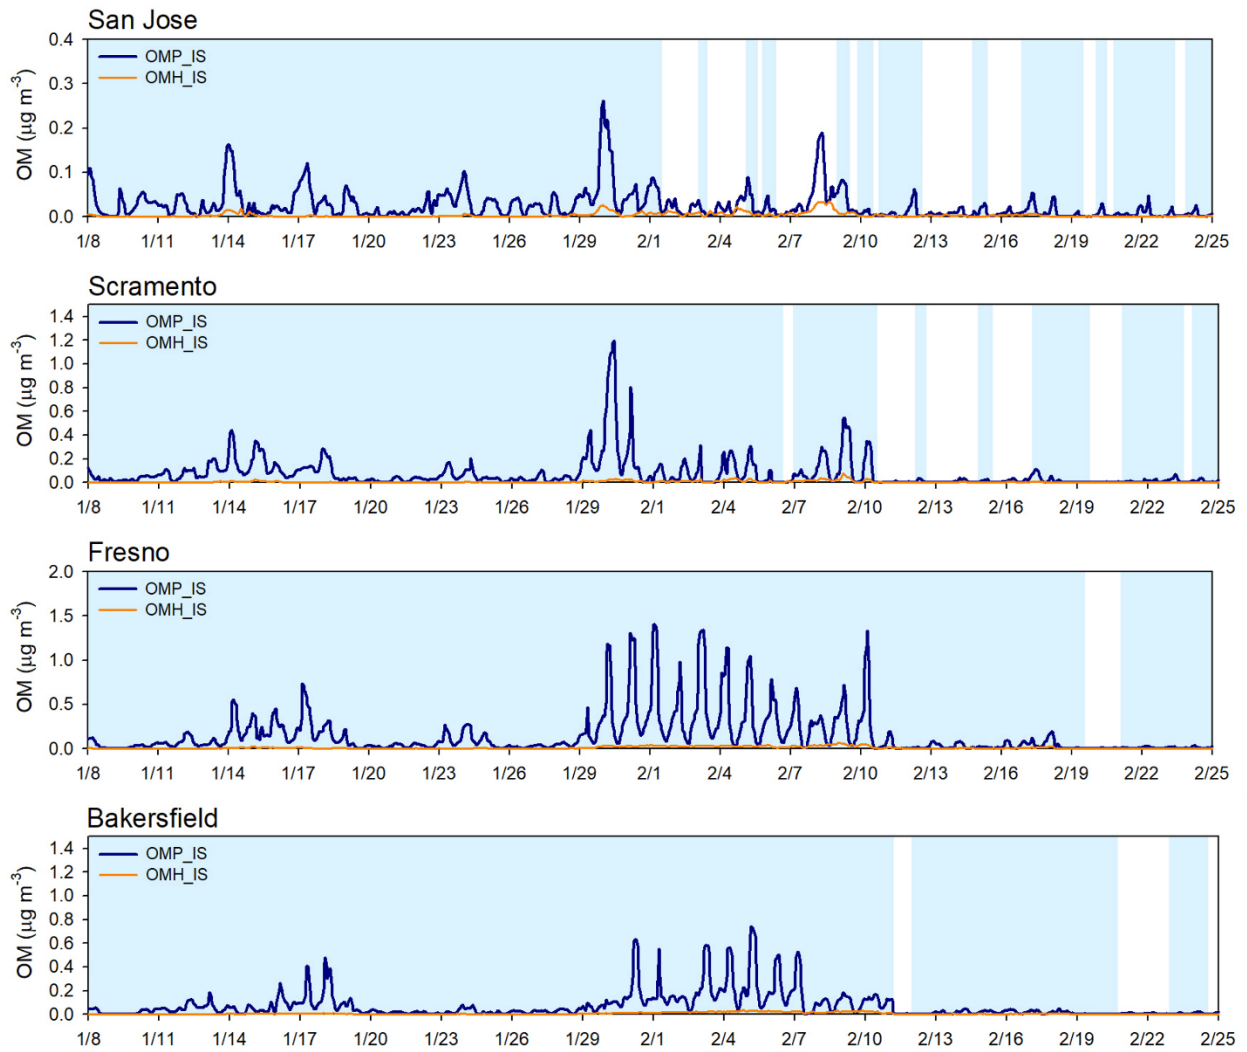

Fig. S10. (Continued)

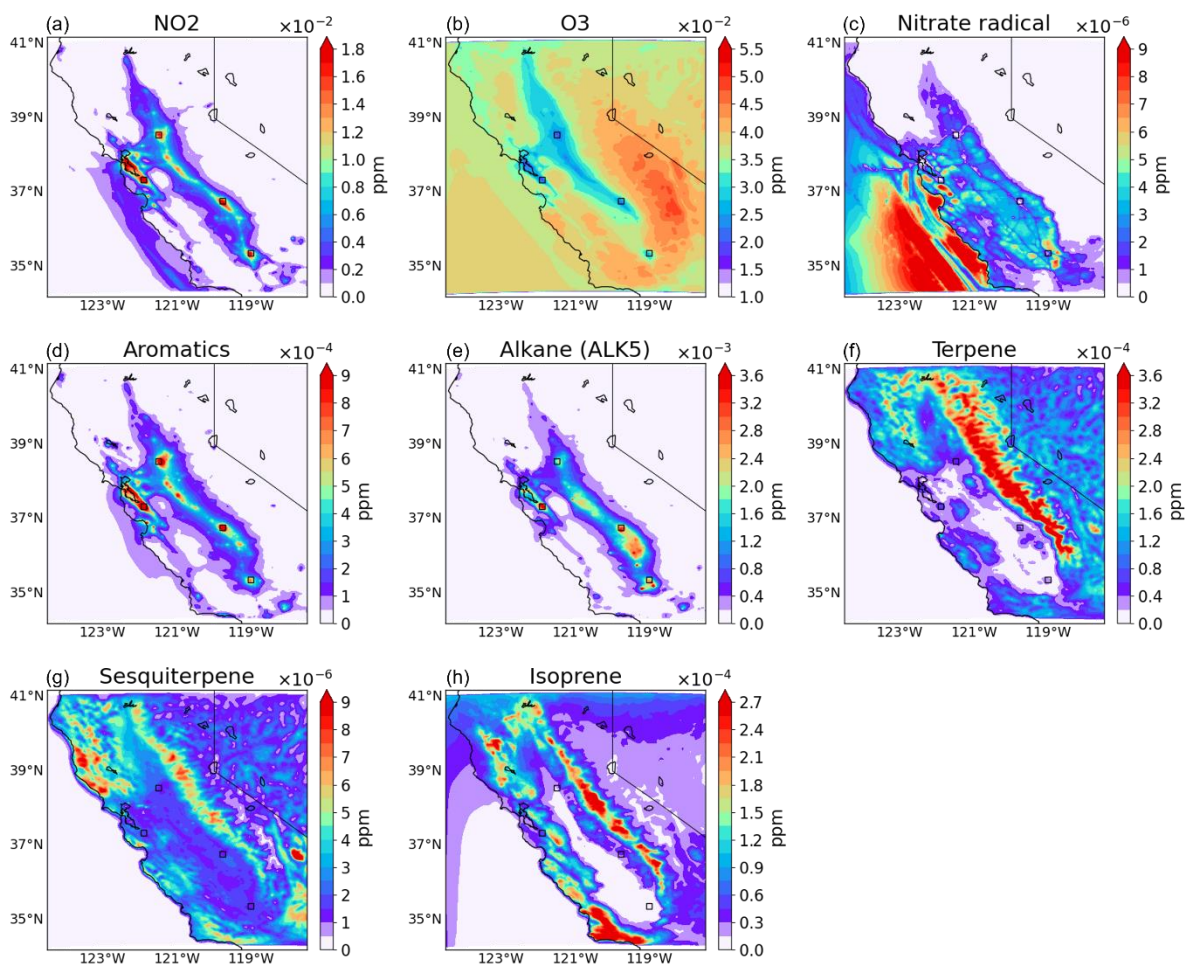

**Fig. S11.** Spatial distributions of (a)  $\text{NO}_2$ , (b) Ozone, (c) Nitrate radical, (d) Aromatics, (e) Alkane (ALK5), (f) Terpene, (g) Sesquiterpene, and (h) Isoprene concentrations averaged between 01/23/2018 and 02/24/2018. Aromatics is the sum of benzene, toluene, o-xylene, p-xylene, m-xylene, and 1,2,4-trimethylbenzene.

**Section S5. The time series of the predicted concentrations of inorganic species (sulfate, nitrate, and ammonium) and the comparison of aerosol acidity (proton concentration) between the prediction (ISORROPIA model) and observation.**

**(a) Sulfate**

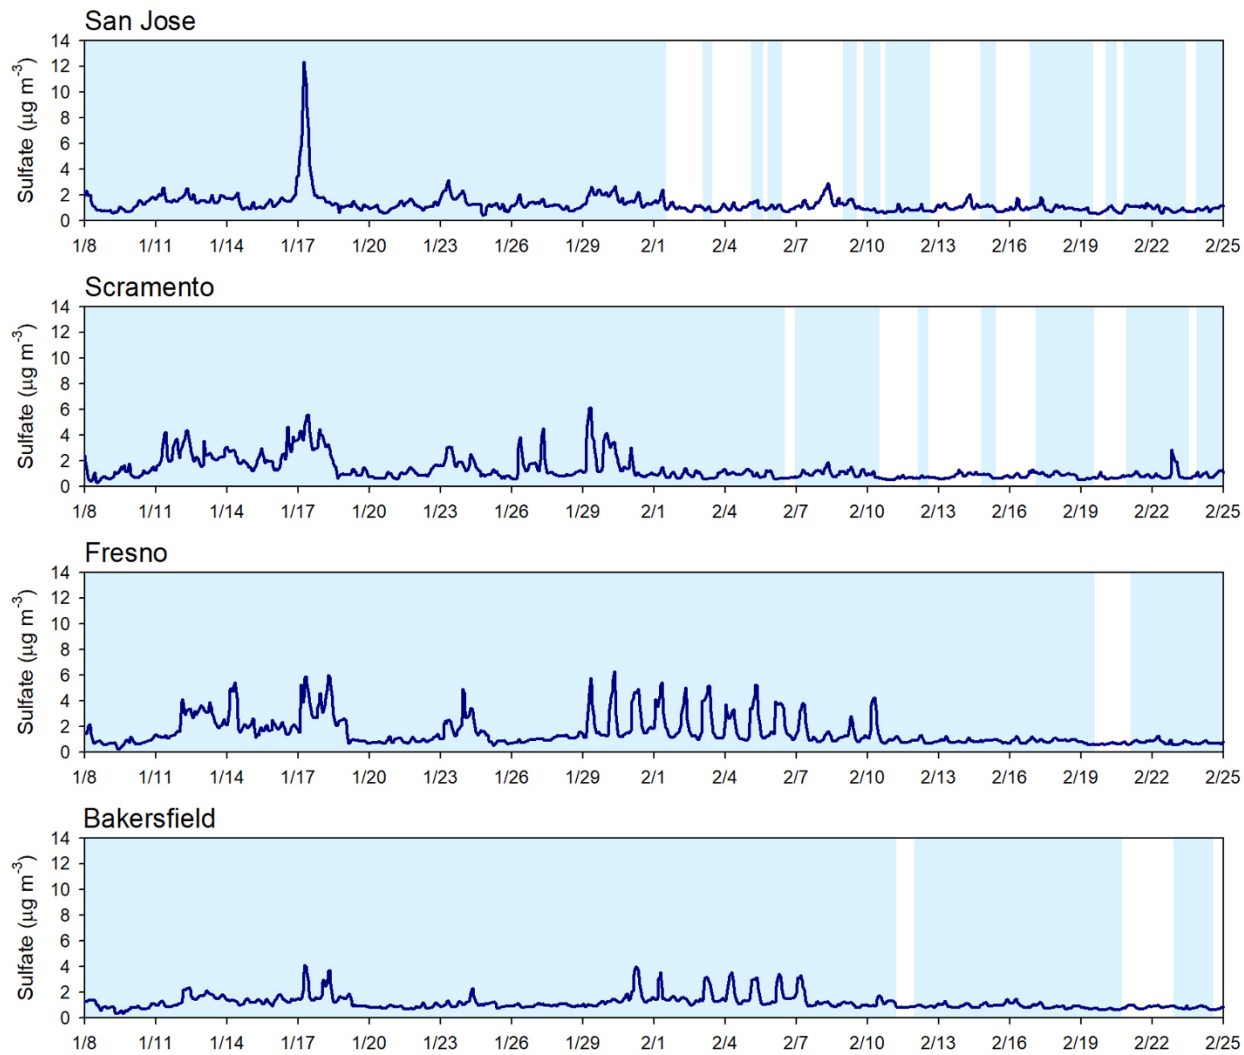

**Fig. S12.** Time series of hourly simulated (a) Sulfate, (b) Nitrate, and (c) Ammonium at each site between January and February in 2018.

(b) Nitrate

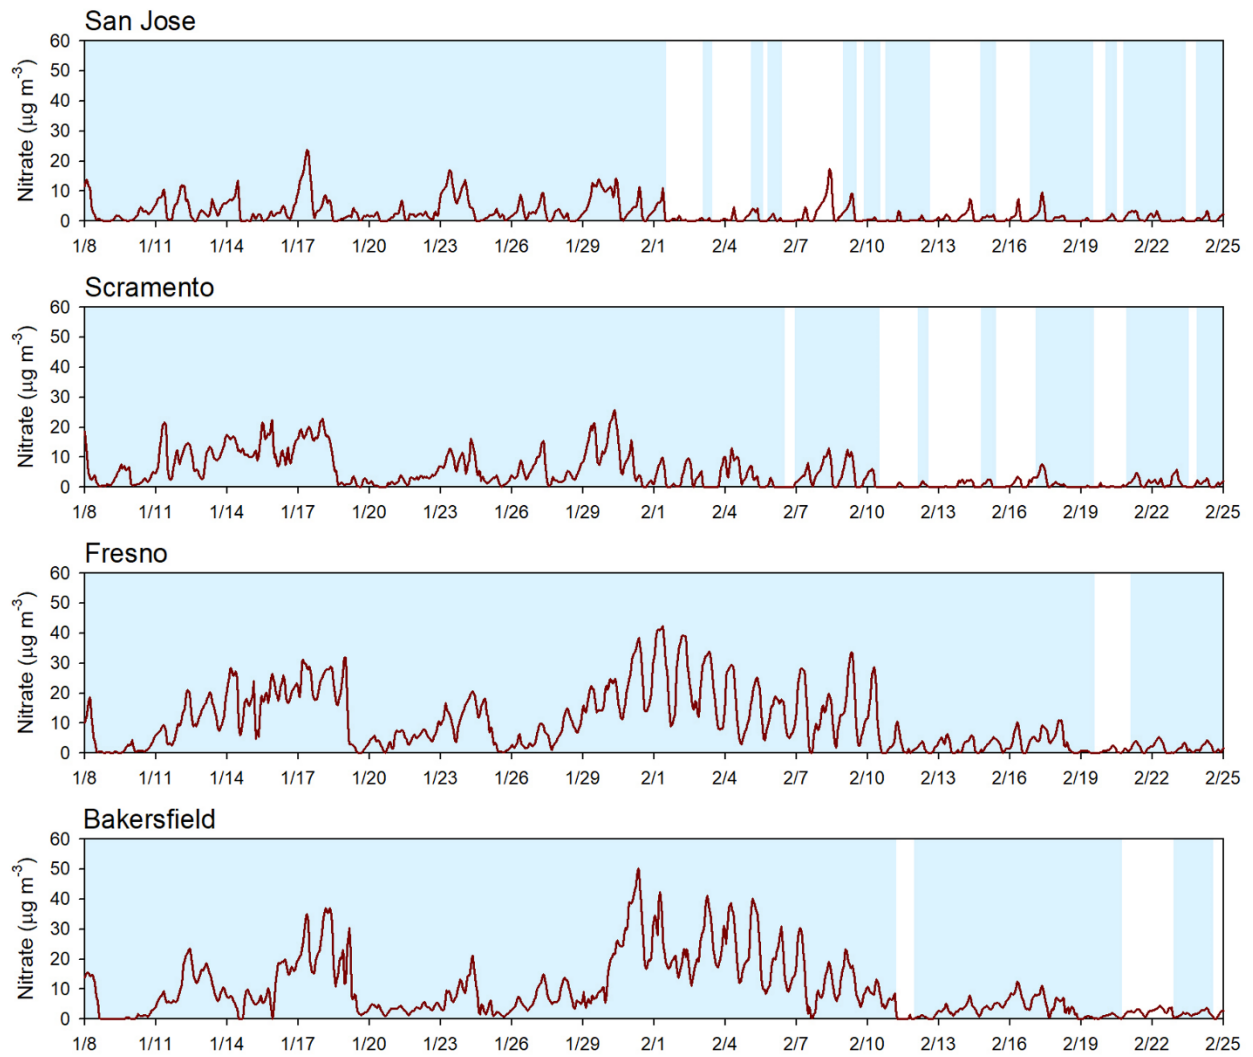

Fig. S12. (Continued)

(c) Ammonium

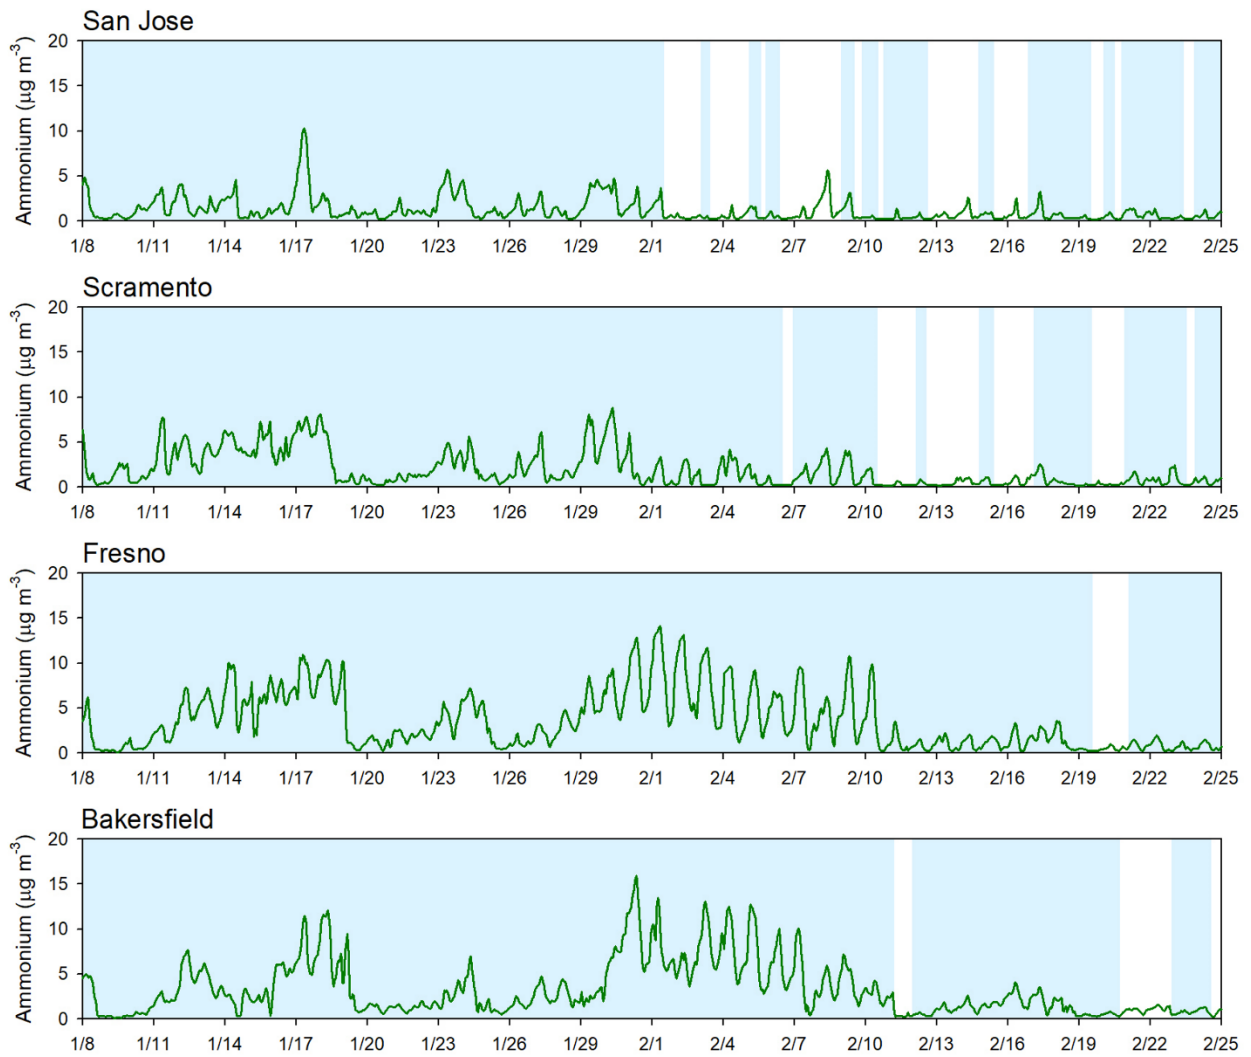

Fig. S12. (Continued)

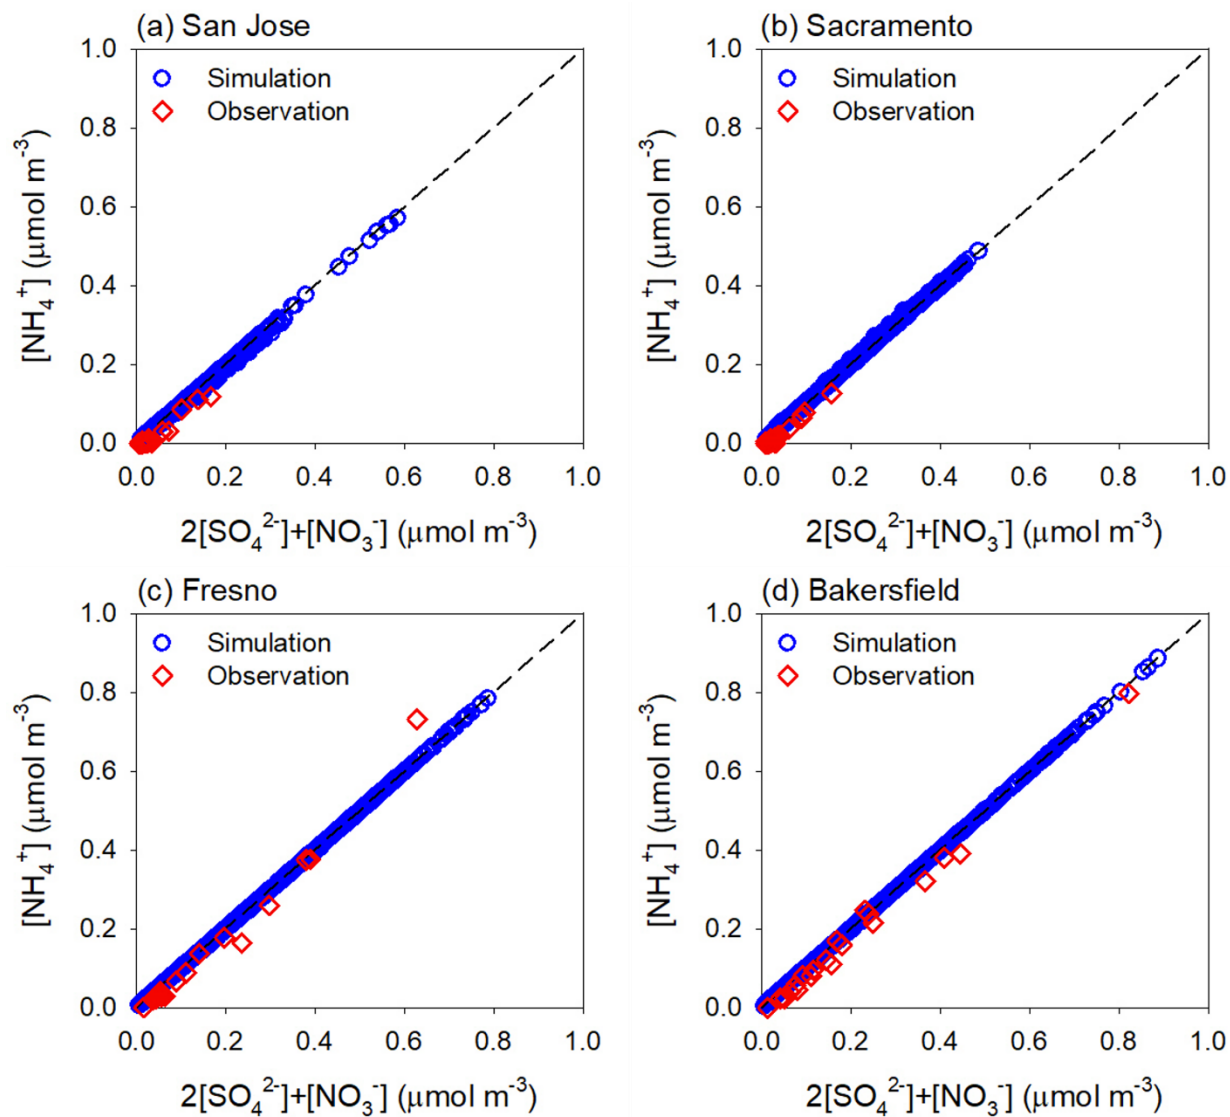

**Fig. S13.** Scatter plots of observed (red diamond) and simulated (blue circle) anion charges vs. ammonium ions along with the one-to-one line (dash) for the fully titrated inorganic aerosol.

**Section S6. The HCHO-to-NO<sub>2</sub> ratio (FNR) in CA and the diurnal variation of simulated PBL height.**

FNR < 1 and FNR > 2 correspond to VOC-limited (NO<sub>x</sub>-rich) and NO<sub>x</sub>-limited conditions, respectively, (Duncan et al., 2010; Hoque et al., 2022).

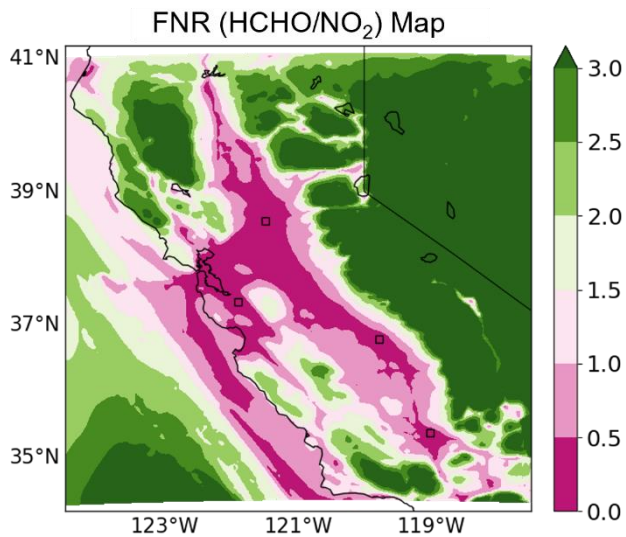

**Fig. S14.** Spatial distribution of the surface HCHO-to-NO<sub>2</sub> ratio (FNR) from CAMx simulation in CA (February 2018).



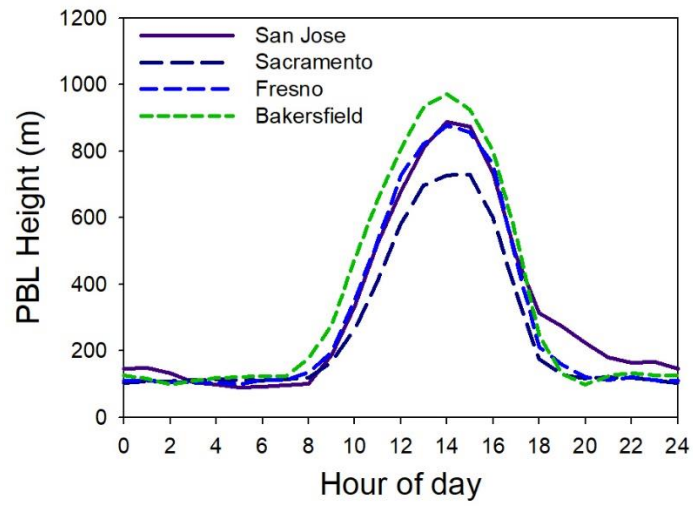

**Fig. S15.** Diurnal variation of simulated PBL height at four sites averaged between 01/23/2018 and 02/24/2018.

## References

- Berg, L. K., Gustafson, W. I., Kassianov, E. I., and Deng, L.: Evaluation of a Modified Scheme for Shallow Convection: Implementation of CuP and Case Studies, *Monthly Weather Review*, 141, 134-147, <https://doi.org/10.1175/mwr-d-12-00136.1>, 2013.
- Colella, P. and Woodward, P. R.: The Piecewise Parabolic Method (PPM) for Gasdynamical Simulations, *J. Comp. Phys.*, 54, 174-201, 1984.
- Duncan, B. N., Yoshida, Y., Olson, J. R., Sillman, S., Martin, R. V., Lamsal, L., Hu, Y., Pickering, K. E., Retscher, C., Allen, D. J., and Crawford, J. H.: Application of OMI observations to a space-based indicator of NO<sub>x</sub> and VOC controls on surface ozone formation, *Atmos. Environ.*, 44, 2213-2223, [10.1016/j.atmosenv.2010.03.010](https://doi.org/10.1016/j.atmosenv.2010.03.010), 2010.
- Fountoukis, C. and Nenes, A.: ISORROPIA II: a computationally efficient thermodynamic equilibrium model for K<sup>+</sup>-Ca<sup>2+</sup>-Mg<sup>2+</sup>-NH<sub>4</sub><sup>+</sup>-Na<sup>+</sup>-SO<sub>4</sub><sup>2-</sup>-NO<sub>3</sub><sup>-</sup>-Cl<sup>-</sup>-H<sub>2</sub>O aerosols, *Atmos. Chem. Phys.*, 7, 4639-4659, <https://doi.org/10.5194/acp-7-4639-2007>, 2007.
- Hoque, H. M. S., Sudo, K., Irie, H., Damiani, A., Naja, M., and Fatmi, A. M.: Multi-axis differential optical absorption spectroscopy (MAX-DOAS) observations of formaldehyde and nitrogen dioxide at three sites in Asia and comparison with the global chemistry transport model CHASER, *Atmos. Chem. Phys.*, 22, 12559-12589, [10.5194/acp-22-12559-2022](https://doi.org/10.5194/acp-22-12559-2022), 2022.
- Hutzell, W. T., Luecken, D. J., Appel, K. W., and Carter, W. P. L.: Interpreting predictions from the SAPRC07 mechanism based on regional and continental simulations, *Atmospheric Environment*, 46, 417-429, <https://doi.org/10.1016/j.atmosenv.2011.09.030>, 2012.
- Iacono, M. J., Delamere, J. S., Mlawer, E. J., Shephard, M. W., Clough, S. A., and Collins, W. D.: Radiative forcing by long-lived greenhouse gases: Calculations with the AER radiative transfer models, *Journal of Geophysical Research*, 113, <https://doi.org/10.1029/2008jd009944>, 2008.
- Jiménez, P. A., Dudhia, J., González-Rouco, J. F., Navarro, J., Montávez, J. P., and García-Bustamante, E.: A Revised Scheme for the WRF Surface Layer Formulation, *Monthly Weather Review*, 140, 898-918, <https://doi.org/10.1175/mwr-d-11-00056.1>, 2012.
- Morrison, H., Thompson, G., and Tatarskii, V.: Impact of Cloud Microphysics on the Development of Trailing Stratiform Precipitation in a Simulated Squall Line: Comparison of One- and Two-Moment Schemes, *Monthly Weather Review*, 137, 991-1007, <https://doi.org/10.1175/2008mwr2556.1>, 2009.
- Nenes, A., C., Pilinis, and Pandis, S. N.: ISORROPIA: A New Thermodynamic Model for Multiphase Multicomponent Inorganic Aerosols, *Aquatic Geochemistry*, 4, 123-152, 1998.
- Pleim, J. E.: A Combined Local and Nonlocal Closure Model for the Atmospheric Boundary Layer. Part I: Model Description and Testing, *Journal of Applied Meteorology and Climatology*, 46, 1383-1395, <https://doi.org/10.1175/jam2539.1>, 2007.
- Pleim, J. E. and Gilliam, R.: An Indirect Data Assimilation Scheme for Deep Soil Temperature in the Pleim-Xiu Land Surface Model, *Journal of Applied Meteorology and Climatology*, 48, 1362-1376, <https://doi.org/10.1175/2009jamc2053.1>, 2009.
- Seinfeld, J. H. and Pandis, S. N.: *Atmospheric Chemistry and Physics from air pollution to climate change*, New York. John Wiley and Sons, Incorporated, 1998.

Willmott, C. J.: On the Evaluation of Model Performance in Physical Geography, in: *Spatial Statistics and Models*, edited by: Gaile, G. L., and Willmott, C. J., Springer Netherlands, Dordrecht, 443-460, [https://doi.org/10.1007/978-94-017-3048-8\\_23](https://doi.org/10.1007/978-94-017-3048-8_23), 1984.

Zhang, L., Brook, J. R., and Vet, R.: A revised parameterization for gaseous dry deposition in air-quality models, *Atmos. Chem. Phys.*, 3, 2067-2082, <https://doi.org/10.5194/acp-3-2067-2003>, 2003.
